# Supplementary material for: Rigid 3D-spiro chromanone as a crux for efficient antimicrobial agents: synthesis, biological and computational evaluation
Source: Royal Society of Chemistry journal article supplement (doi:10.1039/d1ra03497a), 2021-01-01
Supplement: d1ra03497a2.xlsx [file d1ra03497a2.xlsx]

## Sheet: Sheet1
Biological activity	1		2		3		4		5		7		8		9		10		11		12		13		14		15		16		17		18		19		20		21
	Pa	Pi	Pa	Pi	Pa	Pi	Pa	Pi	Pa	Pi	Pa	Pi	Pa	Pi	Pa	Pi	Pa	Pi	Pa	Pi	Pa	Pi	Pa	Pi	Pa	Pi	Pa	Pi	Pa	Pi	Pa	Pi	Pa	Pi	Pa	Pi	Pa	Pi	Pa	Pi
Antiinfective
Antiinfective	0,699	0,007	0,484	0,024	0,415	0,041	0,400	0,046	0,458	0,029	0,528	0,019	0,473	0,026	0	0	0,225	0,185	0,398	0,047	0	0	0,270	0,130	0,514	0,021	0	0	0,236	0,169	0	0	0	0	0	0	0	0	0	0
Antimycobacterial	0,299	0,081	0,198	0,175	0,311	0,074	0,276	0,097	0,259	0,111	0,225	0,144	0,478	0,022	0	0	0	0	0,554	0,013	0,385	0,043	0,386	0,043	0,287	0,089	0,245	0,124	0,279	0,095	0,246	0,123	0,320	0,069	0,462	0,025	0	0	0,264	0,107
Anti-Helicobacter pylori	0,234	0,078	0,237	0,075	0,231	0,081	0	0	0,232	0,080	0,204	0,122	0	0	0	0	0	0	0,228	0,085	0	0	0	0	0,254	0,058	0	0	0	0	0	0	0	0	0	0	0	0	0	0
Antibacterial	0,205	0,112	0	0	0,163	0,152	0	0	0	0	0	0	0,171	0,145	0	0	0	0	0,192	0,126	0	0	0,188	0,129	0	0	0	0	0	0	0	0	0	0	0	0	0	0	0	0
Antibiotic Anthracycline-like	0,127	0,032	0	0	0	0	0,122	0,037	0	0	0,097	0,084	0	0	0	0	0	0	0	0	0	0	0	0	0,119	0,040	0,206	0,008	0,099	0,076	0	0	0	0	0	0	0	0	0	0
Antifungal	0,297	0,082	0	0	0	0	0	0	0,192	0,142	0,203	0,135	0	0	0	0	0	0	0	0	0	0	0	0	0,231	0,117	0,169	0,161	0	0	0	0	0	0	0	0	0	0	0	0
Antihemorrhagic	0,224	0,015	0,139	0,065	0,154	0,047	0,116	0,112	0,172	0,033	0,196	0,022	0	0	0	0	0,116	0,113	0	0	0	0	0	0	0,144	0,059	0	0	0	0	0	0	0	0	0	0	0	0	0	0
Antiviral	0,203	0,093	0,202	0,094	0,168	0,137	0	0	0	0	0	0	0	0	0	0	0	0	0	0	0,155	0,155	0	0	0	0	0	0	0	0	0	0	0	0	0	0	0	0	0	0
Antiviral (Adenovirus)	0,320	0,073	0	0	0,217	0,183	0,258	0,130	0,317	0,076	0,284	0,103	0	0	0	0	0	0	0	0	0,240	0,151	0,259	0,129	0,250	0,139	0	0	0,211	0,193	0	0	0	0	0	0	0	0	0	0
Antiviral (CMV)	0,224	0,123	0	0	0	0	0	0	0,266	0,057	0,269	0,054	0	0	0	0	0	0	0	0	0	0	0	0	0,239	0,094	0	0	0,203	0,174	0	0	0	0	0	0	0	0	0	0
Antiviral (Hepatitis B)	0,203	0,085	0	0	0,165	0,145	0	0	0,178	0,119	0,172	0,130	0	0	0	0	0	0	0	0	0	0	0	0	0	0	0	0	0	0	0	0	0	0	0	0	0	0	0	0
Antiviral (Herpes)	0,419	0,028	0,325	0,075	0,332	0,070	0,243	0,136	0,337	0,068	0,355	0,057	0,264	0,119	0	0	0	0	0	0	0	0	0	0	0,369	0,050	0	0	0,221	0,155	0	0	0	0	0	0	0	0	0	0
Antiviral (HIV)	0,149	0,067	0	0	0,133	0,088	0	0	0	0	0	0	0	0	0	0	0	0	0	0	0	0	0	0	0	0	0	0	0	0	0	0	0	0	0	0	0	0	0	0
Antiviral (Influenza A)	0,256	0,089	0	0	0	0	0,275	0,064	0,213	0,185	0,237	0,122	0	0	0	0	0	0	0	0	0	0	0	0	0	0	0	0	0,251	0,096	0	0	0	0	0	0	0	0	0	0
Antiviral (Influenza)	0,446	0,033	0,396	0,048	0,306	0,085	0,440	0,035	0,338	0,069	0,331	0,072	0	0	0	0	0	0	0,377	0,054	0	0	0	0	0,380	0,053	0,230	0,156	0,430	0,037	0,263	0,118	0,241	0,142	0,284	0,100	0,220	0,168	0,268	0,114
Antiviral (Picornavirus)	0,417	0,096	0,313	0,206	0	0	0,350	0,158	0,474	0,063	0,436	0,084	0,278	0,266	0	0	0	0	0,469	0,065	0	0	0	0	0,404	0,106	0,274	0,274	0,351	0,157	0	0	0	0	0	0	0	0	0,308	0,214
Antiviral (Rhinovirus)	0,363	0,140	0	0	0	0	0	0	0,518	0,019	0,450	0,049	0,300	0,253	0,355	0,151	0,359	0,145	0,296	0,260	0	0	0	0	0,386	0,108	0,304	0,245	0,390	0,103	0,306	0,240	0	0	0,298	0,257	0	0	0	0
Antiinflammatory
Antiinflammatory	0,548	0,044	0,404	0,093	0,402	0,094	0,293	0,166	0,541	0,046	0,512	0,053	0,239	0,227	0,500	0,057	0,292	0,168	0,251	0,211	0	0	0,444	0,075	0,512	0,053	0,332	0,134	0,289	0,172	0	0	0,338	0,130	0,322	0,142	0,243	0,221	0	0
Antiinflammatory, intestinal	0,330	0,051	0,200	0,189	0,216	0,164	0,383	0,028	0,210	0,173	0,284	0,084	0	0	0	0	0	0	0	0	0	0	0	0	0,349	0,041	0,275	0,092	0,389	0,026	0	0	0,221	0,157	0	0	0,274	0,093	0	0
Antiinflammatory, ophthalmic	0,266	0,140	0,264	0,146	0,282	0,108	0	0	0,291	0,092	0,298	0,082	0	0	0	0	0	0	0	0	0	0	0	0	0,294	0,087	0	0	0,259	0,155	0	0	0	0	0	0	0	0	0	0
Anticancer
Antineoplastic	0,351	0,125	0	0	0	0	0	0	0	0	0	0	0	0	0	0	0	0	0	0	0,222	0,209	0	0	0,353	0,124	0,237	0,196	0	0	0,246	0,188	0,224	0,207	0,272	0,170	0,518	0,066	0,481	0,078
Antineoplastic (brain cancer)	0,216	0,101	0,216	0,099	0	0	0	0	0	0	0	0	0	0	0,362	0,012	0,326	0,019	0,250	0,057	0,206	0,118	0,210	0,110	0,240	0,066	0	0	0,186	0,157	0,220	0,094	0,204	0,122	0,276	0,037	0,205	0,120	0,255	0,053
Antineoplastic (breast cancer)	0,239	0,076	0,158	0,129	0	0	0	0	0	0	0	0	0	0	0	0	0	0	0	0	0	0	0	0	0,248	0,072	0	0	0	0	0	0	0	0	0	0	0	0	0	0
Antineoplastic (non-Hodgkin's lymphoma)	0,303	0,220	0	0	0,341	0,170	0	0	0	0	0	0	0	0	0	0	0	0	0	0	0	0	0	0	0	0	0	0	0	0	0	0	0	0	0	0	0,547	0,023	0	0
Antineoplastic (small cell lung cancer)	0,224	0,136	0	0	0	0	0	0	0	0	0	0	0	0	0	0	0	0	0	0	0	0	0	0	0,240	0,104	0	0	0,201	0,188	0	0	0,213	0,160	0	0	0,202	0,186	0,272	0,054
Antineoplastic enhancer	0,242	0,053	0,251	0,048	0,238	0,055	0	0	0	0	0,189	0,109	0,189	0,109	0	0	0	0	0,165	0,152	0,242	0,053	0,201	0,093	0,268	0,039	0	0	0	0	0,178	0,127	0	0	0	0	0	0	0	0
Antiischemic, cerebral	0,334	0,255	0,825	0,012	0,532	0,089	0	0	0	0	0,343	0,244	0,512	0,099	0	0	0	0	0	0	0,353	0,233	0,319	0,273	0	0	0	0	0	0	0	0	0	0	0	0	0	0	0	0
Anticarcinogenic	0,372	0,036	0,189	0,133	0,207	0,112	0	0	0,238	0,089	0,303	0,057	0	0	0	0	0	0	0	0	0	0	0	0	0,310	0,054	0	0	0,175	0,151	0	0	0	0	0	0	0	0	0	0
Antimetastatic	0,308	0,078	0,203	0,156	0,200	0,159	0,230	0,125	0,236	0,120	0,316	0,074	0	0	0,677	0,003	0,533	0,013	0	0	0	0	0	0	0,248	0,111	0	0	0,190	0,174	0	0	0	0	0	0	0	0	0	0
TP53 expression enhancer	0,681	0,030	0,309	0,203	0,397	0,143	0,369	0,160	0,523	0,079	0,550	0,068	0	0	0	0	0	0	0	0	0	0	0	0	0,601	0,049	0,300	0,210	0,463	0,108	0	0	0	0	0	0	0	0	0	0
Membrane integrity agonist
Membrane integrity agonist	0,923	0,006	0,476	0,110	0,761	0,044	0,674	0,060	0,913	0,008	0,929	0,005	0,695	0,056	0,569	0,083	0,501	0,102	0,596	0,076	0,402	0,139	0,252	0,234	0,875	0,018	0,540	0,090	0,760	0,044	0,538	0,091	0,253	0,233	0,545	0,089	0,246	0,239	0	0
Antiprotozoal
Antiprotozoal (Coccidial)	0,251	0,107	0	0	0	0	0,220	0,151	0	0	0	0	0	0	0	0	0	0	0,233	0,131	0	0	0	0	0,250	0,109	0	0	0	0	0	0	0	0	0	0	0	0	0	0
Antiprotozoal (Leishmania)	0,435	0,037	0	0	0,297	0,103	0	0	0,386	0,054	0,343	0,075	0	0	0	0	0	0	0	0	0	0	0	0	0,452	0,032	0	0	0,272	0,123	0	0	0	0	0	0	0	0	0	0
Antiprotozoal (Trypanosoma)	0,287	0,107	0	0	0	0	0,285	0,109	0	0	0	0	0	0	0	0	0	0	0	0	0	0	0	0	0,239	0,161	0	0	0,221	0,177	0	0	0	0	0	0	0	0	0	0
Antidiabetic
Antidiabetic	0	0	0	0	0	0	0	0	0,490	0,025	0,556	0,017	0	0	0,197	0,167	0	0	0	0	0	0	0	0	0	0	0	0	0	0	0	0	0	0	0	0	0	0	0	0
Antidiabetic (type 2)	0	0	0	0	0	0	0	0	0,193	0,062	0,277	0,035	0	0	0	0	0	0	0	0	0	0	0	0	0	0	0	0	0	0	0	0	0	0	0	0	0	0	0	0
Antidiabetic symptomatic	0	0	0,188	0,146	0	0	0	0	0,229	0,094	0,284	0,049	0,266	0,062	0	0	0	0	0	0	0	0	0	0	0	0	0	0	0	0	0	0	0	0	0,180	0,160	0	0	0	0
CYP enzymes
CYP19 inhibitor	0,438	0,005	0,112	0,072	0,196	0,028	0,195	0,028	0,184	0,030	0,246	0,020	0,119	0,064	0,132	0,053	0,124	0,059	0,102	0,086	0	0	0	0	0,301	0,013	0	0	0,137	0,049	0	0	0	0	0	0	0	0	0	0
CYP19A1 expression inhibitor	0,492	0,010	0,227	0,217	0,298	0,109	0,352	0,058	0,298	0,109	0,382	0,041	0,235	0,204	0,240	0,194	0,230	0,213	0	0	0	0	0	0	0,440	0,019	0,307	0,098	0,375	0,044	0	0	0	0	0	0	0	0	0	0
CYP1A inducer	0,486	0,014	0	0	0,149	0,148	0,186	0,098	0,212	0,075	0,242	0,057	0,227	0,065	0	0	0	0	0	0	0	0	0	0	0,418	0,021	0,213	0,075	0,246	0,056	0	0	0	0	0	0	0	0	0	0
CYP1A inhibitor	0,504	0,010	0,258	0,113	0,400	0,027	0,205	0,181	0,354	0,042	0,340	0,049	0,442	0,018	0,208	0,176	0	0	0,273	0,097	0,227	0,150	0,203	0,184	0,516	0,009	0,222	0,156	0,292	0,081	0,224	0,154	0	0	0	0	0	0	0,201	0,187
CYP1A substrate	0,390	0,051	0	0	0	0	0,286	0,103	0	0	0,222	0,155	0	0	0	0	0	0	0	0	0	0	0	0	0,338	0,072	0	0	0,198	0,188	0	0	0	0	0	0	0	0	0	0
CYP1A1 inhibitor	0,397	0,007	0,217	0,079	0,288	0,029	0,226	0,068	0,260	0,042	0,281	0,032	0,182	0,125	0,177	0,133	0	0	0	0	0	0	0,166	0,151	0,404	0,007	0,195	0,107	0,267	0,038	0,184	0,122	0	0	0,190	0,114	0	0	0	0
CYP1A1 substrate	0,365	0,032	0	0	0	0	0,319	0,049	0,191	0,134	0,226	0,104	0	0	0	0	0	0	0	0	0	0	0	0	0,312	0,052	0	0	0,211	0,115	0	0	0	0	0	0	0	0	0	0
CYP1A2 inducer	0,379	0,016	0	0	0,167	0,140	0,204	0,081	0,314	0,027	0,322	0,025	0,354	0,019	0,180	0,115	0	0	0,238	0,055	0,238	0,055	0,210	0,075	0,429	0,011	0,264	0,042	0,280	0,036	0,189	0,100	0	0	0,171	0,131	0	0	0	0
CYP1A2 inhibitor	0,487	0,011	0,227	0,142	0,366	0,036	0	0	0,334	0,053	0,332	0,054	0,443	0,017	0,201	0,176	0	0	0,271	0,095	0,227	0,143	0,197	0,182	0,500	0,010	0,215	0,158	0,284	0,084	0,215	0,158	0	0	0	0	0	0	0,196	0,183
CYP1A2 substrate	0,358	0,065	0	0	0	0	0	0	0	0	0,227	0,163	0	0	0	0	0	0	0	0	0	0	0	0	0,343	0,073	0	0	0,202	0,199	0	0	0	0	0	0	0	0	0	0
CYP2A substrate	0,445	0,042	0	0	0	0	0	0	0,239	0,123	0,267	0,105	0	0	0	0	0	0	0	0	0	0	0	0	0,422	0,047	0	0	0,182	0,175	0	0	0	0	0	0	0	0	0	0
CYP2A1 substrate	0,550	0,023	0,241	0,202	0,384	0,086	0,289	0,150	0,572	0,019	0,558	0,022	0,336	0,114	0,424	0,067	0,312	0,131	0	0	0	0	0	0	0,601	0,013	0,335	0,115	0,511	0,034	0,252	0,188	0	0	0,353	0,103	0	0	0	0
CYP2A10 substrate	0,388	0,008	0,171	0,064	0,279	0,021	0,206	0,043	0,387	0,008	0,369	0,010	0,306	0,017	0,280	0,021	0,271	0,023	0,271	0,023	0,236	0,031	0,227	0,034	0,422	0,006	0,233	0,032	0,294	0,019	0,283	0,021	0,186	0,053	0,391	0,008	0,171	0,065	0,161	0,074
CYP2A11 substrate	0,612	0,010	0,251	0,061	0,446	0,022	0,333	0,037	0,441	0,022	0,477	0,019	0,364	0,032	0,328	0,038	0,327	0,038	0,316	0,041	0,265	0,055	0,320	0,040	0,644	0,009	0,294	0,046	0,385	0,029	0,350	0,034	0,222	0,075	0,585	0,012	0,205	0,087	0,191	0,098
CYP2A2 substrate	0,616	0,014	0,152	0,138	0,267	0,064	0,190	0,102	0,645	0,011	0,619	0,014	0,299	0,055	0,518	0,025	0,321	0,050	0,177	0,113	0	0	0	0	0,562	0,020	0	0	0,328	0,049	0	0	0	0	0	0	0	0	0	0
CYP2A3 substrate	0,571	0,004	0,153	0,126	0,299	0,038	0,324	0,031	0,192	0,090	0,249	0,057	0	0	0	0	0	0	0	0	0	0	0	0	0,439	0,012	0,187	0,094	0,306	0,036	0	0	0	0	0,152	0,127	0	0	0	0
CYP2A4 substrate	0,655	0,009	0,283	0,123	0,370	0,070	0,399	0,058	0,684	0,007	0,647	0,009	0,444	0,043	0,379	0,066	0,369	0,070	0,341	0,083	0,232	0,176	0	0	0,598	0,014	0,319	0,097	0,475	0,035	0,270	0,135	0	0	0,340	0,084	0	0	0	0
CYP2A5 substrate	0,510	0,010	0	0	0,220	0,131	0,289	0,079	0,404	0,028	0,409	0,027	0,277	0,086	0,184	0,169	0,188	0,165	0,208	0,142	0	0	0	0	0,396	0,031	0,227	0,125	0,317	0,063	0	0	0	0	0,223	0,128	0	0	0	0
CYP2A6 substrate	0,480	0,036	0	0	0	0	0	0	0,258	0,119	0,285	0,100	0	0	0	0	0	0	0	0	0	0	0	0	0,439	0,046	0	0	0,190	0,178	0	0	0	0	0	0	0	0	0	0
CYP2B11 substrate	0,423	0,018	0	0	0,262	0,085	0,287	0,069	0,233	0,106	0,273	0,078	0,179	0,161	0	0	0	0	0	0	0	0	0	0	0,329	0,048	0	0	0,243	0,098	0	0	0	0	0	0	0	0	0	0
CYP2B5 substrate	0,630	0,015	0	0	0,264	0,119	0,320	0,085	0,788	0,004	0,679	0,011	0,498	0,033	0,445	0,044	0,303	0,095	0,383	0,061	0,264	0,119	0	0	0,698	0,009	0,332	0,080	0,567	0,023	0,280	0,108	0	0	0,291	0,101	0	0	0	0
CYP2B6 substrate	0,477	0,040	0	0	0,202	0,173	0,239	0,133	0,285	0,096	0,298	0,088	0	0	0	0	0	0	0	0	0	0	0	0	0,419	0,050	0	0	0,241	0,131	0	0	0	0	0	0	0	0	0	0
CYP2C substrate	0,380	0,081	0	0	0	0	0	0	0,271	0,140	0,410	0,069	0	0	0	0	0	0	0	0	0	0	0	0	0,325	0,107	0	0	0	0	0	0	0	0	0	0	0	0	0	0
CYP2C10 substrate	0	0	0	0	0	0	0	0	0,188	0,145	0,404	0,028	0	0	0	0	0	0	0	0	0	0	0	0	0,217	0,117	0	0	0	0	0	0	0	0	0	0	0	0	0	0
CYP2C11 substrate	0,491	0,025	0,176	0,158	0,237	0,108	0	0	0,367	0,051	0,375	0,049	0	0	0	0	0	0	0	0	0	0	0	0	0,437	0,034	0	0	0,183	0,152	0	0	0	0	0	0	0	0	0	0
CYP2C12 substrate	0,903	0,011	0,327	0,138	0,428	0,103	0,411	0,107	0,820	0,031	0,824	0,030	0,539	0,082	0,332	0,136	0,294	0,157	0,329	0,137	0,241	0,204	0	0	0,831	0,029	0,312	0,147	0,703	0,057	0,266	0,179	0,276	0,170	0,251	0,193	0	0	0	0
CYP2C18 substrate	0,407	0,048	0	0	0	0	0	0	0,478	0,024	0,571	0,007	0	0	0	0	0	0	0	0	0	0	0	0	0,496	0,020	0,182	0,177	0,365	0,063	0	0	0	0	0,185	0,174	0	0	0	0
CYP2C8 inhibitor	0,459	0,083	0,346	0,174	0,344	0,176	0	0	0,300	0,229	0,322	0,202	0	0	0	0	0	0	0	0	0	0	0	0	0,348	0,172	0	0	0,334	0,188	0	0	0	0	0	0	0	0	0	0
CYP2C8 substrate	0,358	0,093	0	0	0	0	0	0	0,347	0,102	0,438	0,054	0	0	0	0	0	0	0	0	0	0	0	0	0,346	0,103	0	0	0,232	0,224	0	0	0	0	0	0	0	0	0	0
CYP2C9 inducer	0,470	0,019	0,348	0,076	0,322	0,102	0,325	0,098	0,361	0,065	0,390	0,046	0,286	0,149	0,250	0,219	0	0	0,274	0,171	0,246	0,226	0,246	0,226	0,483	0,016	0,340	0,082	0,410	0,037	0,263	0,192	0	0	0,251	0,216	0	0	0	0
CYP2D15 substrate	0,376	0,093	0,271	0,241	0	0	0,321	0,159	0,316	0,167	0,375	0,094	0	0	0	0	0	0	0	0	0	0	0	0	0,448	0,040	0,375	0,094	0,479	0,026	0	0	0	0	0	0	0	0	0	0
CYP2D16 substrate	0,393	0,077	0	0	0,232	0,221	0,275	0,168	0	0	0,243	0,205	0	0	0	0	0	0	0	0	0	0	0	0	0,335	0,113	0	0	0,308	0,135	0	0	0	0	0	0	0	0	0	0
CYP2D2 inhibitor	0,297	0,092	0,194	0,192	0	0	0	0	0,226	0,152	0,302	0,088	0	0	0	0	0	0	0	0	0	0	0	0	0,450	0,029	0,267	0,113	0,425	0,036	0	0	0	0	0	0	0	0	0	0
CYP2E1 inducer	0,492	0,021	0	0	0,251	0,158	0,274	0,131	0,475	0,025	0,550	0,012	0,585	0,008	0,216	0,209	0,239	0,174	0,336	0,079	0,253	0,155	0	0	0,554	0,012	0,345	0,074	0,434	0,035	0,358	0,066	0,299	0,107	0,401	0,046	0,256	0,152	0,253	0,154
CYP2F1 substrate	0,465	0,038	0	0	0	0	0,202	0,146	0,448	0,042	0,434	0,045	0,241	0,118	0	0	0	0	0,202	0,145	0	0	0	0	0,388	0,058	0,191	0,155	0,332	0,077	0	0	0	0	0	0	0	0	0	0
CYP2G1 substrate	0,497	0,014	0	0	0,159	0,113	0,212	0,082	0,306	0,050	0,254	0,065	0,141	0,129	0	0	0	0	0	0	0	0	0	0	0,281	0,057	0	0	0,181	0,098	0	0	0	0	0	0	0	0	0	0
CYP2H substrate	0,430	0,183	0	0	0,377	0,246	0,353	0,280	0,331	0,314	0	0	0	0	0	0	0	0	0	0	0	0	0	0	0,529	0,105	0	0	0,387	0,232	0	0	0	0	0	0	0	0	0	0
CYP2J substrate	0,703	0,049	0,344	0,201	0,414	0,166	0,595	0,089	0,457	0,146	0,651	0,068	0	0	0	0	0	0	0	0	0	0	0	0	0,551	0,106	0	0	0,393	0,176	0	0	0	0	0	0	0	0	0	0
CYP2J2 substrate	0,611	0,059	0,314	0,232	0,355	0,196	0,508	0,100	0,377	0,178	0,557	0,079	0	0	0	0	0	0	0	0	0	0	0	0	0,447	0,132	0	0	0,335	0,213	0	0	0	0	0	0	0	0	0	0
CYP3A inducer	0,622	0,017	0,295	0,097	0,356	0,061	0,328	0,075	0,547	0,023	0,490	0,029	0,287	0,104	0,282	0,108	0,281	0,109	0,264	0,127	0,230	0,169	0,228	0,171	0,589	0,019	0,234	0,163	0,351	0,063	0,241	0,154	0	0	0	0	0	0	0	0
CYP3A1 substrate	0,558	0,029	0	0	0,246	0,182	0,245	0,184	0,444	0,071	0,509	0,045	0	0	0	0	0	0	0	0	0	0	0	0	0,520	0,041	0	0	0,303	0,138	0	0	0	0	0	0	0	0	0	0
CYP3A2 substrate	0,587	0,033	0,272	0,264	0,314	0,214	0,329	0,199	0,480	0,087	0,539	0,055	0	0	0	0	0	0	0	0	0	0	0	0	0,538	0,055	0	0	0,370	0,163	0	0	0	0	0	0	0	0	0	0
CYP3A4 inducer	0,637	0,016	0,307	0,097	0,364	0,061	0,338	0,075	0,561	0,022	0,499	0,029	0,301	0,103	0,297	0,106	0,295	0,108	0,280	0,123	0,250	0,162	0,247	0,166	0,609	0,018	0,253	0,158	0,364	0,061	0,260	0,149	0	0	0	0	0	0	0	0
CYP3A7 substrate	0,452	0,021	0	0	0,235	0,141	0,264	0,111	0,322	0,069	0,365	0,048	0	0	0,217	0,166	0	0	0	0	0	0	0	0	0,469	0,017	0,265	0,110	0,373	0,044	0	0	0	0	0	0	0	0	0	0
CYP4A11 substrate	0,427	0,042	0	0	0,232	0,216	0,288	0,146	0,317	0,116	0,393	0,059	0	0	0	0	0	0	0	0	0	0	0	0	0,263	0,174	0	0	0	0	0	0	0	0	0	0	0	0	0	0
CYP7 inhibitor	0,385	0,035	0,238	0,179	0,258	0,144	0,277	0,117	0,243	0,170	0,298	0,094	0	0	0	0	0	0	0	0	0	0	0	0	0,275	0,120	0	0	0,228	0,199	0	0	0	0	0	0	0	0	0	0
Cytochrome P450 inhibitor	0,310	0,054	0,353	0,038	0,303	0,057	0	0	0	0	0,176	0,161	0	0	0	0	0	0	0	0	0	0	0	0	0,327	0,047	0	0	0	0	0	0	0	0	0	0	0	0	0	0
Cytochrome P450 stimulant	0,535	0,022	0,262	0,172	0,277	0,149	0,596	0,014	0,395	0,056	0,359	0,073	0,283	0,140	0,287	0,136	0,233	0,231	0,279	0,146	0,327	0,095	0,311	0,109	0,587	0,015	0,297	0,124	0,468	0,034	0,258	0,179	0	0	0	0	0	0	0	0
UGT enzymes			#N/A	#N/A			#N/A	#N/A
UGT1A substrate	0,479	0,022	0	0	0,229	0,077	0,215	0,085	0,226	0,079	0,281	0,055	0	0	0	0	0	0	0	0	0	0	0	0	0,282	0,054	0	0	0	0	0	0	0	0	0	0	0	0	0	0
UGT1A1 substrate	0,441	0,015	0,159	0,110	0,230	0,050	0,204	0,065	0,173	0,093	0,263	0,039	0	0	0	0	0	0	0	0	0	0	0	0	0,281	0,034	0	0	0,168	0,099	0	0	0	0	0	0	0	0	0	0
UGT1A10 substrate	0,477	0,010	0,120	0,091	0,182	0,042	0,142	0,066	0,184	0,041	0,309	0,022	0	0	0	0	0	0	0	0	0	0	0	0	0,296	0,023	0	0	0,127	0,082	0	0	0	0	0	0	0	0	0	0
UGT1A3 substrate	0,453	0,012	0	0	0,215	0,051	0,208	0,054	0,225	0,046	0,270	0,032	0	0	0	0	0	0	0	0	0	0	0	0	0,287	0,029	0	0	0,146	0,102	0	0	0	0	0	0	0	0	0	0
UGT1A8 substrate	0,421	0,013	0	0	0,157	0,053	0,136	0,064	0,142	0,060	0,253	0,030	0	0	0	0	0	0	0	0	0	0	0	0	0,252	0,030	0	0	0,109	0,087	0	0	0	0	0	0	0	0	0	0
UGT1A9 substrate	0,594	0,014	0,210	0,130	0,303	0,070	0,243	0,105	0,300	0,072	0,349	0,052	0	0	0	0	0	0	0	0	0	0	0	0	0,422	0,035	0	0	0,212	0,128	0	0	0	0	0	0	0	0	0	0
UGT2B12 substrate	0,511	0,019	0,304	0,102	0,286	0,120	0,408	0,044	0	0	0	0	0	0	0	0	0	0	0	0	0	0	0	0	0,274	0,133	0,251	0,164	0,276	0,131	0	0	0	0	0	0	0	0	0	0
UGT2B15 substrate	0,435	0,009	0,123	0,098	0,220	0,043	0,185	0,057	0,145	0,079	0,244	0,035	0	0	0	0	0	0	0	0	0	0	0	0	0,314	0,021	0	0	0,164	0,067	0	0	0	0	0	0	0	0	0	0
Enzyme inhibitors
RNA-directed RNA polymerase inhibitor	0,312	0,135	0	0	0	0	0,238	0,230	0	0	0,270	0,185	0	0	0	0	0	0	0	0	0	0	0	0	0,253	0,208	0	0	0	0	0	0	0	0	0	0	0	0	0	0
RNA synthesis inhibitor	0,315	0,046	0,214	0,150	0,200	0,171	0,228	0,129	0,216	0,147	0,239	0,114	0	0	0	0	0	0	0	0	0,225	0,134	0,265	0,083	0,286	0,064	0,193	0,184	0,228	0,129	0	0	0	0	0	0	0	0	0	0
DNA-(apurinic or apyrimidinic site) lyase inhibitor	0,296	0,076	0	0	0	0	0,190	0,175	0,258	0,103	0,419	0,030	0	0	0	0	0	0	0	0	0	0	0	0	0,224	0,134	0	0	0	0	0	0	0	0	0	0	0	0	0	0
DNA ligase (ATP) inhibitor	0,388	0,019	0	0	0,228	0,082	0,185	0,120	0,204	0,101	0,300	0,046	0	0	0	0	0	0	0	0	0	0	0	0	0,315	0,039	0	0	0,209	0,097	0	0	0	0	0	0	0	0	0	0
DNA polymerase I inhibitor	0	0	0,272	0,102	0,244	0,165	0	0	0	0	0,270	0,105	0	0	0	0	0,514	0,007	0	0	0	0	0	0	0	0	0	0	0	0	0	0	0	0	0	0	0	0	0	0
Chlordecone reductase inhibitor	0,869	0,009	0,298	0,154	0,510	0,081	0,491	0,085	0,798	0,020	0,920	0,004	0,435	0,100	0,394	0,112	0,426	0,102	0,272	0,171	0	0	0	0	0,838	0,014	0,418	0,105	0,751	0,029	0,355	0,127	0,252	0,186	0,237	0,198	0	0	0	0
Aspulvinone dimethylallyltransferase inhibitor	0,868	0,015	0,582	0,104	0,581	0,104	0,755	0,047	0,707	0,061	0,767	0,043	0,477	0,148	0,323	0,250	0,349	0,228	0,356	0,222	0	0	0	0	0,884	0,011	0,697	0,064	0,855	0,019	0,437	0,170	0,455	0,159	0,449	0,163	0,326	0,246	0	0
Membrane permeability inhibitor	0,831	0,006	0,616	0,079	0,790	0,011	0,572	0,104	0,767	0,016	0,812	0,008	0,542	0,122	0,306	0,244	0,358	0,222	0,411	0,198	0,457	0,173	0,446	0,180	0,758	0,019	0,279	0,255	0,558	0,112	0,545	0,120	0,428	0,190	0	0	0,442	0,182	0	0
P-benzoquinone reductase (NADPH) inhibitor	0,810	0,003	0,294	0,079	0,421	0,033	0,526	0,017	0,350	0,052	0,485	0,022	0,266	0,100	0,227	0,140	0,236	0,129	0,223	0,146	0	0	0	0	0,536	0,016	0,250	0,114	0,362	0,048	0	0	0	0	0,287	0,084	0	0	0	0
Ubiquinol-cytochrome-c reductase inhibitor	0,796	0,034	0,357	0,224	0,437	0,181	0,693	0,071	0,594	0,110	0,710	0,065	0,377	0,213	0	0	0	0	0	0	0	0	0	0	0,753	0,049	0,415	0,192	0,656	0,085	0	0	0	0	0	0	0	0	0	0
Pin1 inhibitor	0,792	0,004	0,459	0,058	0,563	0,026	0,610	0,017	0,606	0,018	0,672	0,010	0,530	0,033	0,353	0,118	0,353	0,118	0,456	0,059	0,380	0,099	0,320	0,146	0,821	0,003	0,507	0,040	0,666	0,010	0,491	0,045	0,372	0,104	0,434	0,068	0,347	0,123	0,266	0,204
MAP kinase stimulant	0,771	0,004	0,511	0,038	0,642	0,011	0,487	0,047	0,436	0,072	0,482	0,049	0,357	0,126	0,265	0,222	0,267	0,219	0,297	0,185	0	0	0	0	0,720	0,005	0,432	0,074	0,585	0,019	0,298	0,183	0,260	0,228	0,246	0,245	0,297	0,184	0	0
Aldehyde oxidase inhibitor	0,766	0,012	0	0	0,280	0,104	0,294	0,097	0,535	0,044	0,544	0,042	0,205	0,170	0	0	0	0	0	0	0	0	0	0	0,674	0,021	0,238	0,134	0,407	0,065	0	0	0	0	0,206	0,169	0	0	0	0
HIF1A expression inhibitor	0,764	0,014	0,476	0,066	0,538	0,046	0,418	0,091	0,403	0,099	0,535	0,047	0,266	0,218	0,282	0,198	0,296	0,182	0	0	0,285	0,195	0,371	0,119	0,641	0,027	0,532	0,048	0,679	0,022	0,493	0,059	0,388	0,108	0,568	0,039	0,444	0,079	0,393	0,105
Peroxidase inhibitor	0,763	0,006	0,156	0,124	0,238	0,080	0,362	0,057	0,222	0,085	0,567	0,029	0,328	0,061	0	0	0	0	0	0	0	0	0	0	0,584	0,027	0,437	0,047	0,275	0,071	0	0	0	0	0	0	0	0	0	0
27-Hydroxycholesterol 7alpha-monooxygenase inhibitor	0,750	0,009	0,441	0,080	0,690	0,014	0,444	0,078	0,507	0,049	0,506	0,050	0,405	0,103	0,423	0,090	0,342	0,162	0,351	0,152	0	0	0	0	0,694	0,013	0,313	0,198	0,475	0,062	0	0	0	0	0	0	0	0	0	0
Aryl-alcohol dehydrogenase (NADP+) inhibitor	0,740	0,004	0	0	0,194	0,046	0,245	0,031	0,127	0,084	0,265	0,027	0,107	0,105	0	0	0	0	0	0	0	0	0	0	0,305	0,022	0	0	0,153	0,065	0	0	0	0	0,129	0,082	0	0	0	0
Testosterone 17beta-dehydrogenase (NADP+) inhibitor	0,730	0,045	0,289	0,267	0,453	0,155	0,499	0,133	0,389	0,191	0,526	0,120	0	0	0	0	0	0	0	0	0	0	0	0	0,568	0,103	0	0	0,382	0,196	0	0	0	0	0	0	0	0	0	0
Kinase inhibitor	0,723	0,011	0,273	0,180	0,520	0,031	0,348	0,098	0,412	0,061	0,453	0,046	0,378	0,078	0,397	0,068	0,455	0,045	0,354	0,094	0,466	0,042	0,472	0,041	0,661	0,015	0,646	0,016	0,768	0,008	0,613	0,019	0,498	0,035	0,631	0,018	0,458	0,045	0,510	0,032
Oxidoreductase inhibitor	0,721	0,013	0	0	0,357	0,127	0,622	0,030	0,670	0,020	0,666	0,020	0,354	0,129	0,256	0,209	0	0	0,489	0,078	0,281	0,179	0,297	0,165	0,649	0,024	0,239	0,234	0,513	0,069	0,252	0,215	0	0	0,349	0,131	0	0	0	0
Histidine kinase inhibitor	0,717	0,007	0,266	0,132	0,505	0,028	0,376	0,061	0,382	0,059	0,496	0,029	0,333	0,081	0,261	0,138	0,316	0,091	0,310	0,096	0,261	0,138	0,371	0,063	0,442	0,040	0,340	0,077	0,375	0,062	0,277	0,121	0,277	0,121	0,340	0,077	0,236	0,168	0,276	0,122
Phosphatase inhibitor	0,710	0,011	0,604	0,045	0,623	0,036	0,608	0,043	0,632	0,033	0,684	0,016	0,542	0,080	0,495	0,112	0,519	0,096	0,486	0,119	0,396	0,195	0,475	0,128	0,620	0,038	0,425	0,169	0,542	0,080	0,420	0,173	0,324	0,273	0,398	0,193	0,304	0,301	0	0
Thioredoxin inhibitor	0,708	0,010	0,321	0,157	0,367	0,122	0,587	0,032	0,347	0,137	0,400	0,103	0,256	0,222	0	0	0	0	0	0	0	0	0,268	0,209	0,555	0,040	0,296	0,179	0,451	0,077	0	0	0	0	0	0	0	0	0	0
2-Dehydropantoate 2-reductase inhibitor	0,700	0,016	0	0	0,323	0,138	0,399	0,088	0,406	0,085	0,582	0,034	0,447	0,069	0	0	0	0	0,267	0,199	0,243	0,237	0,258	0,213	0,419	0,079	0,407	0,084	0,328	0,133	0	0	0	0	0	0	0	0	0	0
Nicotinic alpha6beta3beta4alpha5 receptor antagonist	0,700	0,034	0,451	0,152	0,465	0,142	0,510	0,115	0,369	0,219	0,538	0,100	0,342	0,247	0	0	0	0	0	0	0	0	0	0	0,624	0,060	0,370	0,219	0,556	0,091	0	0	0	0	0	0	0	0	0	0
Glucan endo-1,6-beta-glucosidase inhibitor	0,694	0,020	0,360	0,093	0,426	0,071	0,514	0,050	0,269	0,143	0,392	0,081	0	0	0	0	0	0	0	0	0	0	0	0	0,410	0,075	0	0	0,329	0,107	0	0	0	0	0	0	0	0	0	0
Gluconate 2-dehydrogenase (acceptor) inhibitor	0,688	0,063	0,474	0,224	0,438	0,257	0,610	0,115	0,672	0,073	0,782	0,021	0	0	0	0	0	0	0	0	0,464	0,232	0,612	0,114	0,800	0,016	0,554	0,156	0,670	0,074	0,483	0,215	0,401	0,296	0,418	0,277	0,411	0,284	0	0
Cholestanetriol 26-monooxygenase inhibitor	0,686	0,007	0	0	0,277	0,063	0,349	0,039	0,237	0,086	0,304	0,052	0	0	0	0	0	0	0	0	0	0	0	0	0,382	0,032	0	0	0,229	0,092	0	0	0	0	0,181	0,142	0	0	0	0
Lysase inhibitor	0,686	0,025	0,336	0,130	0,311	0,148	0,665	0,029	0,419	0,090	0,617	0,039	0,277	0,180	0	0	0	0	0	0	0	0	0	0	0,688	0,025	0,367	0,112	0,571	0,048	0	0	0	0	0	0	0	0	0	0
JAK2 expression inhibitor	0,682	0,020	0,255	0,171	0,283	0,149	0,454	0,067	0	0	0,273	0,156	0	0	0	0	0	0	0	0	0	0	0	0	0,609	0,030	0,351	0,108	0,548	0,042	0	0	0	0	0	0	0	0	0	0
MMP9 expression inhibitor	0,676	0,008	0,247	0,146	0,349	0,072	0,361	0,066	0,382	0,057	0,508	0,027	0,238	0,156	0,225	0,172	0,232	0,163	0	0	0	0	0	0	0,644	0,011	0,340	0,076	0,520	0,025	0,217	0,182	0,205	0,198	0,269	0,125	0,222	0,176	0	0
4-Nitrophenol 2-monooxygenase inhibitor	0,670	0,011	0,287	0,169	0,447	0,055	0,375	0,090	0,457	0,051	0,553	0,026	0,327	0,127	0,278	0,182	0	0	0,275	0,185	0	0	0,251	0,222	0,757	0,005	0,355	0,104	0,545	0,028	0,262	0,204	0	0	0,403	0,075	0	0	0	0
HMOX1 expression enhancer	0,662	0,012	0,369	0,068	0,426	0,053	0,346	0,075	0,417	0,055	0,641	0,014	0,216	0,153	0,186	0,185	0,189	0,181	0	0	0	0	0	0	0,496	0,037	0,288	0,100	0,279	0,106	0	0	0	0	0	0	0	0	0	0
3-Phytase inhibitor	0,656	0,009	0,340	0,059	0,409	0,036	0,523	0,018	0,289	0,087	0,475	0,024	0	0	0	0	0	0	0	0	0	0	0	0	0,349	0,055	0	0	0,264	0,107	0	0	0	0	0	0	0	0	0	0
Dehydro-L-gulonate decarboxylase inhibitor	0,648	0,030	0	0	0,213	0,163	0,443	0,064	0,199	0,177	0,286	0,114	0	0	0	0	0	0	0	0	0	0	0	0	0,318	0,100	0	0	0,281	0,117	0	0	0	0	0	0	0	0	0	0
Methylenetetrahydrofolate reductase (NADPH) inhibitor	0,636	0,035	0	0	0,204	0,139	0,254	0,104	0,709	0,029	0,837	0,014	0	0	0	0	0	0	0	0	0	0	0	0	0,303	0,083	0	0	0,181	0,163	0	0	0	0	0	0	0	0	0	0
Leukotriene-B4 20-monooxygenase inhibitor	0,633	0,008	0,207	0,122	0,398	0,049	0,420	0,044	0,387	0,052	0,536	0,020	0	0	0	0	0	0	0	0	0	0	0	0	0,462	0,034	0	0	0,262	0,094	0	0	0	0	0	0	0	0	0	0
Alkane 1-monooxygenase inhibitor	0,630	0,025	0,229	0,138	0,269	0,113	0,437	0,057	0,197	0,166	0,276	0,110	0	0	0	0	0	0	0	0	0	0	0	0	0,325	0,088	0	0	0,216	0,149	0	0	0	0	0	0	0	0	0	0
AR expression inhibitor	0,620	0,011	0,276	0,081	0,379	0,047	0,322	0,062	0,291	0,074	0,370	0,049	0,210	0,136	0	0	0	0	0	0	0	0	0	0	0,543	0,020	0,228	0,117	0,361	0,051	0	0	0	0	0,183	0,176	0	0	0	0
Gastrin inhibitor	0,614	0,019	0,611	0,019	0,607	0,021	0,393	0,133	0,620	0,017	0,632	0,014	0,395	0,132	0,461	0,090	0,317	0,187	0,393	0,133	0,419	0,116	0,269	0,227	0,648	0,011	0,287	0,211	0,487	0,075	0,294	0,205	0	0	0	0	0	0	0	0
Gonadotropin antagonist	0,611	0,005	0,338	0,100	0,399	0,058	0,382	0,070	0,550	0,010	0,503	0,017	0,448	0,034	0,290	0,138	0,274	0,152	0,401	0,057	0,292	0,137	0,291	0,138	0,598	0,006	0,387	0,066	0,475	0,024	0,405	0,055	0,293	0,136	0,270	0,156	0,251	0,174	0	0
Neurotransmitter antagonist	0,608	0,011	0,259	0,248	0,424	0,077	0,363	0,121	0,335	0,147	0,439	0,068	0	0	0	0	0	0	0	0	0	0	0	0	0,577	0,017	0,409	0,086	0,533	0,029	0	0	0,269	0,232	0,404	0,090	0	0	0	0
Sugar-phosphatase inhibitor	0,605	0,054	0,268	0,213	0,342	0,157	0,376	0,137	0,395	0,126	0,530	0,074	0	0	0	0	0	0	0	0	0	0	0	0	0,424	0,113	0	0	0,350	0,151	0	0	0	0	0	0	0	0	0	0
Glutathione thiolesterase inhibitor	0,602	0,033	0,233	0,171	0,274	0,137	0,405	0,076	0	0	0,267	0,142	0	0	0	0	0	0	0	0	0	0	0	0	0,295	0,124	0	0	0,250	0,155	0	0	0	0	0	0	0	0	0	0
Ribulose-phosphate 3-epimerase inhibitor	0,598	0,042	0,365	0,157	0,448	0,100	0,399	0,131	0,369	0,154	0,457	0,094	0	0	0	0	0	0	0	0	0	0	0	0	0,446	0,101	0	0	0,372	0,152	0	0	0	0	0	0	0	0	0	0
NADPH-ferrihemoprotein reductase inhibitor	0,597	0,014	0,188	0,176	0,267	0,087	0,280	0,079	0,316	0,062	0,635	0,011	0	0	0	0	0	0	0	0	0	0	0	0	0,319	0,061	0	0	0,236	0,112	0	0	0	0	0	0	0	0	0	0
GST M substrate	0,594	0,006	0,201	0,102	0,242	0,071	0,339	0,034	0,230	0,079	0,293	0,047	0	0	0	0	0	0	0	0	0	0	0	0	0,425	0,019	0,213	0,092	0,300	0,045	0	0	0	0	0	0	0	0	0	0
Glyoxylate oxidase inhibitor	0,582	0,009	0,212	0,091	0,272	0,063	0,362	0,038	0,207	0,094	0,379	0,035	0	0	0	0	0	0	0	0	0	0	0	0	0,410	0,030	0	0	0,260	0,068	0	0	0	0	0	0	0	0	0	0
5 Hydroxytryptamine uptake stimulant	0,580	0,009	0,369	0,150	0,516	0,027	0,406	0,106	0,412	0,100	0,481	0,044	0,338	0,193	0	0	0	0	0	0	0	0	0	0	0,481	0,044	0,378	0,139	0,452	0,064	0	0	0	0	0,389	0,125	0	0	0	0
Steroid N-acetylglucosaminyltransferase inhibitor	0,579	0,015	0,224	0,118	0,224	0,118	0,322	0,069	0,243	0,106	0,324	0,068	0	0	0	0	0	0	0	0	0	0	0	0	0,475	0,030	0,177	0,156	0,367	0,055	0	0	0	0	0	0	0	0	0	0
APOA1 expression enhancer	0,578	0,014	0,302	0,187	0,362	0,103	0,649	0,007	0,331	0,141	0,434	0,052	0	0	0	0	0,290	0,208	0	0	0	0	0	0	0,373	0,092	0,289	0,211	0,536	0,020	0	0	0	0	0	0	0,324	0,152	0	0
CDP-glycerol glycerophosphotransferase inhibitor	0,572	0,093	0,666	0,063	0,535	0,108	0,435	0,164	0	0	0,393	0,198	0	0	0	0	0	0	0	0	0	0	0	0	0,463	0,146	0	0	0	0	0	0	0	0	0,342	0,257	0	0	0,310	0,304
NADPH-cytochrome-c2 reductase inhibitor	0,570	0,043	0,304	0,190	0,420	0,100	0,372	0,130	0,313	0,181	0,450	0,085	0	0	0	0	0	0	0	0	0	0	0	0	0,373	0,130	0	0	0,304	0,191	0	0	0	0	0	0	0	0	0	0
Nicotinic alpha2beta2 receptor antagonist	0,568	0,056	0,294	0,200	0,321	0,175	0,366	0,141	0	0	0,345	0,156	0	0	0	0	0	0	0	0	0	0	0	0	0,467	0,089	0	0	0,407	0,116	0	0	0	0	0	0	0	0	0	0
4-Coumarate-CoA ligase inhibitor	0,566	0,010	0,231	0,114	0,338	0,054	0,288	0,076	0,337	0,055	0,482	0,020	0,212	0,131	0	0	0	0	0	0	0	0	0	0	0,494	0,018	0,197	0,147	0,351	0,050	0,186	0,162	0	0	0	0	0	0	0	0
Ovulation inhibitor	0,566	0,027	0,509	0,052	0,552	0,032	0,450	0,088	0,397	0,122	0,408	0,115	0,378	0,134	0	0	0	0	0,251	0,228	0	0	0	0	0,586	0,021	0,411	0,113	0,513	0,050	0,252	0,227	0,335	0,163	0	0	0	0	0	0
5-O-(4-coumaroyl)-D-quinate 3'-monooxygenase inhibitor	0,560	0,060	0	0	0,323	0,207	0,439	0,116	0,593	0,049	0,538	0,068	0	0	0,277	0,258	0	0	0	0	0	0	0	0	0,468	0,100	0	0	0,472	0,098	0	0	0	0	0	0	0	0	0	0
Ecdysone 20-monooxygenase inhibitor	0,558	0,028	0,295	0,134	0,444	0,058	0,270	0,155	0,607	0,019	0,583	0,023	0,244	0,182	0	0	0	0	0	0	0	0	0	0	0,415	0,068	0	0	0,244	0,182	0	0	0	0	0	0	0	0	0	0
Platelet adhesion inhibitor	0,554	0,029	0,505	0,062	0,565	0,024	0,380	0,185	0,389	0,176	0,466	0,097	0,472	0,091	0,291	0,268	0	0	0	0	0	0	0,284	0,274	0,532	0,042	0,390	0,174	0,489	0,074	0,366	0,198	0,377	0,188	0,315	0,247	0	0	0	0
Polarisation stimulant	0,551	0,021	0,512	0,030	0,668	0,005	0,408	0,065	0,309	0,116	0,367	0,083	0	0	0	0	0	0	0	0	0	0	0,237	0,189	0,504	0,032	0	0	0	0	0	0	0	0	0	0	0	0	0	0
4-Methoxybenzoate monooxygenase (O-demethylating) inhibitor	0,548	0,013	0	0	0,231	0,127	0,459	0,025	0,246	0,111	0,386	0,040	0	0	0	0	0	0	0	0	0	0	0	0	0,498	0,019	0,241	0,116	0,456	0,026	0	0	0	0	0	0	0	0	0	0
2-Enoate reductase inhibitor	0,547	0,005	0,166	0,098	0,268	0,038	0,230	0,053	0,358	0,018	0,695	0,003	0,162	0,101	0	0	0	0	0	0	0	0	0	0	0,358	0,018	0	0	0,206	0,066	0	0	0	0	0,141	0,127	0	0	0	0
Quercetin 2,3-dioxygenase inhibitor	0,542	0,004	0	0	0,155	0,055	0,371	0,016	0,234	0,033	0,209	0,039	0,121	0,075	0	0	0	0	0,112	0,082	0	0	0	0	0,224	0,035	0,160	0,054	0,130	0,068	0	0	0	0	0	0	0	0	0	0
NADPH peroxidase inhibitor	0,537	0,059	0	0	0,295	0,165	0,389	0,107	0,236	0,221	0,498	0,069	0	0	0	0	0	0	0	0	0	0	0	0	0,297	0,163	0	0	0,267	0,190	0	0	0	0	0	0	0	0	0	0
Salicylate 1-monooxygenase inhibitor	0,536	0,012	0,199	0,101	0,241	0,077	0,403	0,030	0,202	0,099	0,386	0,033	0	0	0	0	0	0	0	0	0	0	0	0	0,321	0,048	0	0	0,178	0,117	0	0	0	0	0	0	0	0	0	0
NOS2 expression inhibitor	0,534	0,007	0,301	0,045	0,325	0,035	0,308	0,042	0,325	0,035	0,376	0,023	0,263	0,067	0,230	0,092	0,223	0,099	0,214	0,106	0,221	0,100	0,199	0,118	0,500	0,009	0,359	0,026	0,327	0,035	0,249	0,078	0	0	0,240	0,085	0	0	0	0
RELA expression inhibitor	0,533	0,007	0,261	0,137	0,319	0,078	0,322	0,076	0,288	0,105	0,345	0,061	0,253	0,147	0	0	0	0	0,216	0,211	0	0	0	0	0,501	0,011	0,283	0,111	0,392	0,037	0,238	0,171	0	0	0,256	0,144	0,218	0,205	0	0
Menopausal disorders treatment	0,530	0,011	0,369	0,069	0,421	0,041	0,372	0,067	0,471	0,022	0,487	0,018	0,263	0,156	0,245	0,178	0,244	0,179	0	0	0	0	0	0	0,481	0,020	0,265	0,154	0,397	0,052	0	0	0,229	0,200	0	0	0	0	0	0
Calcium channel (voltage-sensitive) activator	0,529	0,059	0	0	0,312	0,286	0,384	0,192	0,417	0,154	0,378	0,199	0	0	0	0	0	0	0	0	0	0	0	0	0,565	0,038	0,428	0,143	0,542	0,050	0	0	0,310	0,290	0	0	0	0	0	0
Nitrate reductase (cytochrome) inhibitor	0,528	0,039	0	0	0,233	0,205	0,302	0,128	0,386	0,079	0,350	0,096	0	0	0	0	0	0	0	0	0	0	0	0	0,438	0,060	0	0	0,333	0,106	0	0	0	0	0	0	0	0	0	0
Acetylcholine neuromuscular blocking agent	0,527	0,058	0,465	0,097	0,570	0,035	0,370	0,158	0,438	0,114	0,375	0,155	0	0	0	0	0	0	0	0	0	0	0	0	0,583	0,029	0,366	0,161	0,536	0,053	0	0	0	0	0	0	0	0	0	0
Glutamyl endopeptidase II inhibitor	0,527	0,081	0	0	0,317	0,237	0,367	0,185	0,338	0,214	0,402	0,156	0	0	0	0	0	0	0	0	0	0	0	0	0,443	0,126	0	0	0,376	0,177	0	0	0	0	0	0	0	0	0	0
Acrocylindropepsin inhibitor	0,523	0,103	0	0	0	0	0,441	0,142	0,476	0,123	0,614	0,070	0,325	0,219	0	0	0	0	0	0	0	0	0	0	0,625	0,066	0,462	0,130	0,644	0,061	0	0	0,341	0,206	0	0	0	0	0	0
Chymosin inhibitor	0,523	0,103	0	0	0	0	0,441	0,142	0,476	0,123	0,614	0,070	0,325	0,219	0	0	0	0	0	0	0	0	0	0	0,625	0,066	0,462	0,130	0,644	0,061	0	0	0,341	0,206	0	0	0	0	0	0
Saccharopepsin inhibitor	0,523	0,103	0	0	0	0	0,441	0,142	0,476	0,123	0,614	0,070	0,325	0,219	0	0	0	0	0	0	0	0	0	0	0,625	0,066	0,462	0,130	0,644	0,061	0	0	0,341	0,206	0	0	0	0	0	0
Complement factor D inhibitor	0,518	0,064	0	0	0	0	0,368	0,150	0,452	0,094	0,398	0,127	0,295	0,224	0	0	0	0	0	0	0	0	0	0	0,570	0,046	0,343	0,173	0,496	0,073	0	0	0	0	0	0	0	0	0	0
Beta-carotene 15,15'-monooxygenase inhibitor	0,517	0,013	0,150	0,141	0,252	0,069	0,168	0,123	0,249	0,070	0,376	0,029	0	0	0	0	0	0	0	0	0	0	0	0	0,377	0,029	0	0	0,275	0,059	0	0	0	0	0	0	0	0	0	0
Fatty-acyl-CoA synthase inhibitor	0,513	0,044	0	0	0,316	0,110	0,278	0,131	0	0	0,241	0,156	0	0	0	0	0	0	0	0	0	0	0	0	0,303	0,117	0	0	0,217	0,176	0	0	0	0	0	0	0	0	0	0
Platelet aggregation stimulant	0,513	0,062	0,348	0,187	0,329	0,207	0,573	0,035	0,546	0,046	0,593	0,028	0,424	0,122	0,605	0,024	0,478	0,083	0,365	0,171	0,318	0,218	0,276	0,265	0,452	0,100	0,331	0,205	0,471	0,088	0,349	0,187	0	0	0	0	0	0	0	0
Trans-acenaphthene-1,2-diol dehydrogenase inhibitor	0,509	0,042	0,373	0,119	0,350	0,144	0,449	0,065	0	0	0,338	0,158	0	0	0	0	0	0	0	0	0	0	0	0	0	0	0	0	0	0	0	0	0	0	0	0	0	0	0	0
3-Hydroxybenzoate 6-monooxygenase inhibitor	0,505	0,035	0,237	0,212	0,276	0,155	0,387	0,070	0,513	0,034	0,451	0,047	0,276	0,155	0,232	0,220	0	0	0,228	0,227	0	0	0	0	0,418	0,058	0	0	0,315	0,116	0	0	0	0	0	0	0	0	0	0
Xanthine oxidase inhibitor	0,504	0,003	0,174	0,039	0,348	0,005	0,256	0,014	0,314	0,007	0,425	0,004	0,284	0,010	0,161	0,044	0,136	0,059	0,299	0,008	0,178	0,037	0,194	0,031	0,347	0,005	0,197	0,030	0,169	0,041	0,150	0,050	0	0	0,102	0,094	0	0	0	0
Histamine release inhibitor	0,501	0,037	0	0	0,350	0,120	0,424	0,077	0,495	0,039	0,466	0,054	0,261	0,176	0	0	0	0	0,229	0,206	0,270	0,169	0	0	0,445	0,065	0,437	0,070	0	0	0	0	0	0	0,252	0,183	0	0	0	0
Mannan endo-1,4-beta-mannosidase inhibitor	0,501	0,030	0	0	0,286	0,122	0,314	0,102	0,244	0,160	0,379	0,068	0	0	0	0	0	0	0	0	0	0	0	0	0,404	0,058	0	0	0,278	0,129	0	0	0	0	0	0	0	0	0	0
Phobic disorders treatment	0,501	0,173	0,554	0,146	0	0	0	0	0,361	0,266	0,581	0,132	0	0	0	0	0	0	0	0	0	0	0	0	0,521	0,162	0	0	0,443	0,207	0	0	0	0	0	0	0	0	0	0
Insulysin inhibitor	0,500	0,050	0,276	0,159	0,310	0,131	0	0	0,296	0,141	0,304	0,135	0	0	0	0	0	0	0,251	0,186	0	0	0	0	0,440	0,071	0	0	0,271	0,164	0	0	0	0	0	0	0,306	0,134	0	0
1-Alkylglycerophosphocholine O-acetyltransferase inhibitor	0,498	0,026	0	0	0,178	0,138	0	0	0,284	0,079	0,476	0,030	0	0	0	0	0	0	0	0	0	0	0	0	0,291	0,076	0	0	0,178	0,138	0	0	0	0	0	0	0	0	0	0
Aminobutyraldehyde dehydrogenase inhibitor	0,498	0,044	0,279	0,205	0,347	0,129	0,501	0,043	0,259	0,235	0,323	0,153	0	0	0	0	0	0	0	0	0	0	0	0	0,342	0,134	0,319	0,157	0,334	0,142	0	0	0	0	0	0	0	0	0	0
Nicotinic alpha4beta4 receptor agonist	0,495	0,083	0,301	0,280	0,301	0,280	0	0	0	0	0	0	0	0	0	0	0	0	0	0	0	0	0	0	0,336	0,225	0	0	0,315	0,257	0	0	0	0	0	0	0	0	0	0
NF-E2-related factor 2 stimulant	0,492	0,007	0	0	0,294	0,057	0,281	0,064	0,280	0,065	0,303	0,053	0,188	0,135	0	0	0	0	0	0	0	0	0	0	0,456	0,010	0,176	0,148	0,320	0,045	0	0	0	0	0	0	0	0	0	0
CF transmembrane conductance regulator agonist	0,488	0,010	0	0	0,347	0,063	0,308	0,105	0,442	0,018	0,384	0,038	0,339	0,070	0,312	0,099	0,318	0,092	0,340	0,069	0,342	0,067	0,361	0,052	0,353	0,058	0,308	0,104	0,321	0,088	0,294	0,126	0,264	0,184	0,259	0,194	0	0	0,317	0,094
Glycosylphosphatidylinositol phospholipase D inhibitor	0,485	0,106	0	0	0	0	0,315	0,203	0,286	0,229	0,580	0,071	0	0	0	0	0	0	0	0	0	0	0	0	0,364	0,168	0	0	0,342	0,183	0	0	0	0	0	0	0	0	0	0
Macrophage colony stimulating factor agonist	0,485	0,071	0	0	0,316	0,201	0,353	0,160	0,419	0,106	0,548	0,047	0,334	0,180	0	0	0	0	0,275	0,258	0	0	0	0	0,409	0,114	0	0	0,347	0,166	0	0	0	0	0	0	0	0	0	0
Fusarinine-C ornithinesterase inhibitor	0,480	0,102	0	0	0,356	0,202	0,364	0,193	0,339	0,221	0,408	0,153	0	0	0	0	0	0	0	0	0	0	0	0	0,484	0,099	0,295	0,276	0,432	0,134	0	0	0	0	0	0	0	0	0	0
Nitrite reductase [NAD(P)H] inhibitor	0,479	0,019	0,247	0,123	0,306	0,075	0,361	0,048	0,249	0,121	0,365	0,047	0	0	0	0	0	0	0	0	0	0	0	0	0,397	0,036	0	0	0,274	0,097	0	0	0	0	0	0	0	0	0	0
UDP-N-acetylglucosamine 4-epimerase inhibitor	0,477	0,064	0,257	0,217	0,329	0,144	0,286	0,184	0,260	0,214	0,343	0,133	0	0	0	0	0	0	0	0	0	0	0	0	0,326	0,147	0	0	0,261	0,212	0	0	0	0	0	0	0	0	0	0
Feruloyl esterase inhibitor	0,476	0,050	0	0	0,209	0,184	0,292	0,115	0,266	0,133	0,405	0,068	0	0	0	0	0	0	0	0	0	0	0	0	0,459	0,054	0,200	0,194	0,370	0,079	0	0	0	0	0	0	0	0	0	0
GST A substrate	0,475	0,064	0	0	0	0	0,355	0,104	0,385	0,092	0,665	0,028	0	0	0	0	0	0	0	0	0	0	0	0	0,313	0,124	0	0	0,236	0,173	0	0	0	0	0	0	0	0	0	0
Alkenylglycerophosphocholine hydrolase inhibitor	0,473	0,067	0	0	0	0	0,275	0,143	0,414	0,082	0,664	0,036	0	0	0	0	0	0	0	0	0	0	0	0	0,337	0,109	0	0	0,274	0,144	0	0	0	0	0	0	0	0	0	0
Glucan 1,4-alpha-maltotriohydrolase inhibitor	0,468	0,036	0,180	0,172	0,235	0,120	0,263	0,103	0,245	0,114	0,331	0,070	0	0	0	0	0	0	0	0	0	0	0	0	0,312	0,078	0	0	0,245	0,114	0	0	0	0	0	0	0	0	0	0
Histamine release stimulant	0,468	0,044	0,314	0,142	0,304	0,149	0	0	0,429	0,066	0,325	0,135	0	0	0	0	0	0	0	0	0	0	0	0	0,432	0,064	0	0	0,380	0,098	0	0	0	0	0	0	0	0	0	0
Electron-transferring-flavoprotein dehydrogenase inhibitor	0,467	0,080	0	0	0,333	0,176	0,314	0,196	0,325	0,184	0,396	0,123	0	0	0	0	0	0	0	0	0	0	0	0	0,386	0,130	0	0	0,315	0,196	0	0	0	0	0	0	0	0	0	0
Glycogen synthase stimulant	0,467	0,009	0,407	0,019	0,370	0,030	0,423	0,015	0,382	0,026	0,442	0,012	0,351	0,039	0,348	0,041	0,338	0,046	0,343	0,044	0,318	0,060	0,337	0,047	0,441	0,012	0,370	0,030	0,433	0,014	0,305	0,071	0,304	0,072	0,320	0,058	0,291	0,085	0,267	0,115
2-Hydroxyquinoline 8-monooxygenase inhibitor	0,463	0,064	0	0	0,273	0,212	0,304	0,172	0,251	0,247	0,380	0,105	0	0	0	0	0	0	0	0	0	0	0	0	0,431	0,078	0	0	0,388	0,101	0	0	0	0	0	0	0	0	0	0
Malate dehydrogenase (acceptor) inhibitor	0,463	0,040	0,264	0,160	0,288	0,133	0,280	0,141	0,383	0,068	0,351	0,085	0	0	0	0	0	0	0	0	0	0	0	0	0,373	0,073	0	0	0,281	0,140	0	0	0	0	0	0	0	0	0	0
Cis-1,2-dihydro-1,2-dihydroxynaphthalene dehydrogenase inhibitor	0,462	0,028	0,195	0,138	0,226	0,112	0,318	0,064	0	0	0,340	0,056	0	0	0	0	0	0	0	0	0	0	0	0	0,233	0,107	0	0	0,200	0,134	0	0	0	0	0	0	0	0	0	0
5 Hydroxytryptamine release inhibitor	0,461	0,041	0	0	0,302	0,139	0,277	0,163	0,494	0,031	0,440	0,050	0,400	0,069	0,236	0,209	0	0	0,382	0,080	0,392	0,074	0,257	0,183	0,425	0,056	0,390	0,075	0,321	0,123	0,360	0,094	0	0	0,427	0,055	0	0	0	0
Beta glucuronidase inhibitor	0,461	0,052	0	0	0,318	0,109	0	0	0,224	0,187	0,317	0,109	0	0	0	0	0	0	0	0	0	0	0,211	0,205	0,297	0,120	0	0	0,231	0,177	0	0	0	0	0,241	0,166	0,229	0,179	0	0
Protein-disulfide reductase (glutathione) inhibitor	0,461	0,087	0	0	0,277	0,260	0,285	0,248	0,479	0,079	0,471	0,082	0	0	0	0	0	0	0	0	0	0	0	0	0,308	0,216	0	0	0	0	0	0	0	0	0	0	0	0	0	0
(R)-6-hydroxynicotine oxidase inhibitor	0,460	0,061	0	0	0,280	0,169	0,355	0,113	0	0	0,276	0,172	0	0	0	0	0	0	0	0	0	0	0	0	0,313	0,142	0	0	0,297	0,154	0	0	0	0	0	0	0	0	0	0
Rubredoxin-NAD+ reductase inhibitor	0,460	0,029	0,255	0,237	0,293	0,165	0,395	0,059	0,353	0,091	0,516	0,016	0	0	0	0	0	0	0	0	0	0	0	0	0,400	0,055	0,252	0,244	0,337	0,107	0	0	0	0	0,257	0,232	0	0	0	0
Phosphatidylcholine-retinol O-acyltransferase inhibitor	0,459	0,065	0,258	0,239	0,324	0,153	0,320	0,157	0,442	0,072	0,445	0,070	0	0	0	0	0	0	0	0	0	0	0	0	0,386	0,102	0	0	0,324	0,153	0	0	0	0	0	0	0	0	0	0
Phthalate 4,5-dioxygenase inhibitor	0,458	0,093	0	0	0,292	0,234	0,323	0,198	0	0	0,454	0,096	0	0	0	0	0	0	0	0	0	0	0	0	0,370	0,154	0	0	0,348	0,173	0	0	0	0	0	0	0	0	0	0
Morphine 6-dehydrogenase inhibitor	0,457	0,012	0	0	0,230	0,079	0,230	0,079	0,187	0,099	0,308	0,048	0	0	0	0	0	0	0	0	0	0	0	0	0,291	0,054	0	0	0,185	0,100	0	0	0	0	0	0	0	0	0	0
Hydroxysteroid dehydrogenase inhibitor	0,453	0,003	0,195	0,078	0,270	0,031	0,261	0,034	0,246	0,042	0,291	0,023	0,175	0,100	0,149	0,136	0,158	0,122	0	0	0	0	0	0	0,310	0,018	0,165	0,112	0,253	0,039	0	0	0,153	0,131	0	0	0	0	0	0
Melanin inhibitor	0,451	0,004	0,215	0,029	0,268	0,016	0,202	0,035	0,257	0,018	0,277	0,014	0,156	0,067	0,127	0,112	0,128	0,109	0	0	0	0	0	0	0,386	0,005	0,140	0,088	0,217	0,029	0,138	0,091	0,141	0,087	0,158	0,065	0,138	0,092	0	0
Testosterone 17beta-dehydrogenase inhibitor	0,451	0,005	0,143	0,077	0,203	0,038	0,210	0,035	0,244	0,024	0,306	0,013	0,176	0,052	0,148	0,072	0,147	0,073	0,128	0,092	0	0	0	0	0,276	0,017	0	0	0,176	0,052	0	0	0	0	0	0	0	0	0	0
Hydroxylamine reductase (NADH) inhibitor	0,449	0,019	0,236	0,112	0,280	0,073	0,312	0,055	0,395	0,029	0,384	0,031	0	0	0	0	0	0	0	0	0	0	0	0	0,317	0,053	0	0	0,232	0,118	0	0	0	0	0	0	0	0	0	0
Thromboxane B2 antagonist	0,449	0,061	0	0	0,314	0,192	0	0	0,440	0,068	0,528	0,021	0,361	0,139	0	0	0	0	0	0	0	0	0	0	0,405	0,097	0,363	0,137	0,407	0,095	0	0	0	0	0	0	0	0	0	0
General pump inhibitor	0,448	0,093	0,385	0,154	0,308	0,259	0	0	0,418	0,119	0	0	0	0	0	0	0	0	0	0	0	0	0	0	0,400	0,137	0	0	0,297	0,274	0	0	0	0	0,380	0,160	0	0	0	0
Pseudolysin inhibitor	0,448	0,125	0	0	0	0	0,326	0,252	0	0	0,413	0,154	0	0	0	0	0	0	0	0	0	0	0	0	0,339	0,235	0	0	0,313	0,271	0	0	0	0	0	0	0	0	0	0
Taurine dehydrogenase inhibitor	0,446	0,111	0	0	0	0	0,328	0,181	0	0	0	0	0,346	0,167	0	0	0	0	0	0	0	0	0	0	0,447	0,111	0,329	0,180	0,416	0,126	0	0	0	0	0	0	0	0	0	0
1,4-Lactonase inhibitor	0,444	0,068	0,285	0,208	0,324	0,158	0,303	0,184	0,587	0,024	0,582	0,025	0	0	0	0	0	0	0	0	0	0	0	0	0,389	0,101	0	0	0,339	0,142	0	0	0	0	0	0	0	0	0	0
Monodehydroascorbate reductase (NADH) inhibitor	0,444	0,029	0	0	0,212	0,130	0,261	0,086	0,494	0,023	0,720	0,009	0	0	0	0	0	0	0	0	0	0	0	0	0,261	0,087	0	0	0,190	0,158	0	0	0	0	0	0	0	0	0	0
Octopamine antagonist	0,443	0,056	0,279	0,256	0,341	0,155	0,361	0,131	0	0	0	0	0	0	0	0	0	0	0	0	0	0	0	0	0,416	0,075	0,337	0,161	0,412	0,078	0	0	0	0	0	0	0	0	0	0
Plastoquinol-plastocyanin reductase inhibitor	0,443	0,040	0	0	0	0	0,390	0,056	0,268	0,111	0,319	0,085	0	0	0,183	0,177	0	0	0	0	0	0	0	0	0,475	0,031	0,284	0,102	0,433	0,042	0	0	0	0	0	0	0	0	0	0
Glucan endo-1,3-beta-D-glucosidase inhibitor	0,441	0,083	0,289	0,177	0,319	0,156	0,283	0,182	0,239	0,217	0,410	0,099	0	0	0	0	0	0	0	0	0	0	0	0	0,246	0,212	0	0	0	0	0	0	0	0	0	0	0	0	0	0
Nicotine dehydrogenase inhibitor	0,441	0,048	0	0	0,243	0,237	0,345	0,107	0	0	0,293	0,161	0	0	0	0	0	0	0	0	0	0	0	0	0,431	0,052	0,287	0,169	0,420	0,057	0	0	0	0	0	0	0	0	0	0
Neuropeptide Y4 antagonist	0,440	0,035	0,299	0,177	0,340	0,110	0,341	0,109	0,282	0,214	0,307	0,162	0,265	0,259	0	0	0,267	0,254	0	0	0	0	0	0	0,340	0,111	0	0	0	0	0	0	0	0	0	0	0	0	0	0
Carboxypeptidase Taq inhibitor	0,438	0,079	0	0	0,240	0,209	0,269	0,179	0,351	0,118	0,566	0,043	0	0	0	0	0	0	0	0	0	0	0	0	0,320	0,138	0	0	0,291	0,160	0	0	0	0	0	0	0	0	0	0
N-hydroxyarylamine O-acetyltransferase inhibitor	0,438	0,036	0,258	0,173	0,262	0,166	0,384	0,058	0,275	0,148	0,300	0,120	0	0	0	0	0	0	0	0	0	0	0	0	0,334	0,088	0,242	0,199	0,313	0,107	0	0	0	0	0	0	0	0	0	0
Peptidoglycan glycosyltransferase inhibitor	0,437	0,038	0,270	0,136	0,306	0,105	0,292	0,117	0,419	0,044	0,563	0,012	0,233	0,174	0	0	0	0	0	0	0	0	0	0	0,362	0,070	0	0	0,305	0,106	0	0	0	0	0	0	0	0	0	0
Acylcarnitine hydrolase inhibitor	0,436	0,083	0	0	0,245	0,194	0,245	0,194	0,245	0,194	0,389	0,100	0	0	0	0	0	0	0	0	0	0	0	0	0,293	0,153	0	0	0,230	0,209	0	0	0	0	0	0	0	0	0	0
Glycerol dehydrogenase (NADP+) inhibitor	0,436	0,005	0	0	0,161	0,072	0,177	0,060	0,147	0,086	0,209	0,042	0	0	0	0	0	0	0	0	0	0	0	0	0,225	0,035	0	0	0,155	0,078	0	0	0	0	0	0	0	0	0	0
Phosphoenolpyruvate mutase inhibitor	0,432	0,013	0,183	0,084	0,245	0,051	0,272	0,042	0,198	0,074	0,443	0,012	0	0	0	0	0	0	0	0	0	0	0	0	0,316	0,031	0	0	0,157	0,106	0	0	0	0	0	0	0	0	0	0
Apyrase inhibitor	0,431	0,053	0,279	0,218	0,308	0,171	0,400	0,072	0,362	0,106	0,514	0,022	0	0	0	0	0	0	0	0	0	0	0	0	0,316	0,160	0	0	0,266	0,242	0	0	0	0	0	0	0	0	0	0
EIF4E expression inhibitor	0,429	0,032	0,331	0,099	0,396	0,049	0,404	0,044	0,255	0,197	0,374	0,063	0	0	0	0	0	0	0	0	0	0	0	0	0,311	0,120	0,284	0,154	0,284	0,154	0	0	0	0	0	0	0	0	0	0
GABA aminotransferase inhibitor	0,428	0,038	0	0	0	0	0,286	0,131	0,287	0,130	0,331	0,088	0	0	0	0	0	0	0	0	0	0	0	0	0,310	0,105	0	0	0,285	0,132	0	0	0	0	0	0	0	0	0	0
Polyporopepsin inhibitor	0,419	0,164	0	0	0	0	0,346	0,224	0,412	0,170	0,522	0,102	0	0	0	0	0	0	0	0	0	0	0	0	0,470	0,131	0,328	0,241	0,467	0,132	0	0	0	0	0	0	0	0	0	0
Manganese peroxidase inhibitor	0,414	0,061	0	0	0,223	0,177	0,327	0,095	0	0	0,406	0,064	0,256	0,143	0	0	0	0	0	0	0	0	0	0	0,221	0,180	0,254	0,145	0	0	0	0	0	0	0	0	0	0	0	0
Trimethylamine-oxide aldolase inhibitor	0,414	0,072	0,260	0,217	0,312	0,148	0,293	0,171	0,351	0,112	0,349	0,114	0	0	0	0	0	0	0	0	0	0	0	0	0,286	0,179	0	0	0,253	0,228	0	0	0	0	0	0	0	0	0	0
Glucose oxidase inhibitor	0,413	0,066	0	0	0	0	0,330	0,094	0,214	0,197	0,305	0,107	0,219	0,188	0	0	0	0	0	0	0	0	0	0	0,224	0,181	0,268	0,134	0	0	0	0	0	0	0	0	0	0	0	0
Alcohol dehydrogenase (acceptor) inhibitor	0,412	0,037	0	0	0,240	0,141	0,321	0,071	0,208	0,193	0,324	0,069	0,219	0,174	0	0	0	0	0	0	0	0	0	0	0,325	0,069	0,291	0,090	0,259	0,119	0	0	0	0	0	0	0	0	0	0
Alkylacetylglycerophosphatase inhibitor	0,412	0,086	0	0	0,279	0,177	0,250	0,211	0,298	0,158	0,418	0,083	0	0	0	0	0	0	0	0	0	0	0	0	0,290	0,166	0	0	0,240	0,224	0	0	0	0	0	0	0	0	0	0
Aspartate-phenylpyruvate transaminase inhibitor	0,412	0,060	0,227	0,213	0,287	0,137	0,356	0,085	0	0	0,359	0,084	0	0	0	0	0	0	0	0	0	0	0	0	0,258	0,169	0,295	0,130	0,236	0,199	0	0	0	0	0	0	0	0	0	0
Non-steroidal antiinflammatory agent	0,410	0,020	0,278	0,050	0,254	0,062	0,185	0,114	0,430	0,019	0,393	0,022	0,174	0,128	0,342	0,032	0,166	0,139	0,160	0,148	0	0	0	0	0,464	0,015	0,166	0,139	0,220	0,084	0	0	0	0	0,174	0,127	0	0	0	0
Steroid synthesis inhibitor	0,409	0,010	0,232	0,112	0,253	0,085	0,322	0,034	0,267	0,072	0,288	0,054	0	0	0,194	0,179	0	0	0	0	0	0	0	0	0,294	0,050	0,195	0,177	0,265	0,074	0	0	0	0	0	0	0	0	0	0
Glycerol-3-phosphate dehydrogenase inhibitor	0,407	0,030	0	0	0,227	0,103	0,191	0,142	0,284	0,065	0,559	0,008	0	0	0	0	0	0	0	0	0	0	0	0	0,273	0,070	0	0	0,176	0,165	0	0	0	0	0	0	0	0	0	0
Lipocortins synthesis antagonist	0,402	0,009	0,322	0,019	0,327	0,018	0,369	0,012	0,350	0,014	0,375	0,012	0,298	0,024	0,305	0,022	0,289	0,026	0,277	0,030	0,277	0,030	0,276	0,030	0,371	0,012	0,293	0,025	0,342	0,016	0,252	0,039	0,228	0,052	0,217	0,060	0,200	0,074	0,209	0,066
Oxygen scavenger	0,402	0,094	0	0	0,259	0,236	0,254	0,244	0,255	0,242	0,347	0,132	0	0	0	0	0	0	0	0	0	0	0	0	0,350	0,130	0	0	0,252	0,247	0	0	0	0	0	0	0	0	0	0
Arylsulfate sulfotransferase inhibitor	0,401	0,049	0,193	0,181	0,208	0,160	0,285	0,094	0,310	0,080	0,362	0,060	0	0	0	0	0	0	0	0	0	0	0	0	0,217	0,150	0	0	0	0	0	0	0	0	0	0	0	0	0	0
Fructose 5-dehydrogenase inhibitor	0,398	0,098	0	0	0	0	0,285	0,222	0,280	0,230	0,432	0,076	0	0	0	0	0	0	0	0	0	0	0	0	0,486	0,050	0,289	0,216	0,454	0,065	0	0	0	0	0	0	0	0	0	0
Amine dehydrogenase inhibitor	0,395	0,058	0	0	0	0	0,358	0,076	0	0	0,233	0,218	0,395	0,058	0	0	0	0	0	0	0,276	0,152	0,429	0,045	0,422	0,047	0,556	0,020	0,439	0,042	0,327	0,098	0,442	0,041	0,350	0,082	0,354	0,079	0,288	0,137
Acetylgalactosaminyl-O-glycosyl-glycoprotein beta-1,3-N-acetylglucosaminyltransferase inhibitor	0,388	0,068	0,243	0,238	0,265	0,199	0,286	0,167	0,378	0,075	0,490	0,024	0,248	0,229	0	0	0	0	0	0	0	0	0	0	0,330	0,114	0	0	0,290	0,161	0	0	0	0	0	0	0	0	0	0
1-Acylglycerol-3-phosphate O-acyltransferase inhibitor	0,384	0,046	0	0	0,240	0,156	0,207	0,191	0,391	0,044	0,452	0,028	0	0	0	0	0	0	0	0	0	0	0	0	0,444	0,029	0	0	0,308	0,090	0	0	0	0	0,242	0,153	0	0	0	0
2-Dehydropantolactone reductase (A-specific) inhibitor	0,383	0,004	0,101	0,055	0,139	0,033	0,123	0,041	0,154	0,028	0,252	0,009	0	0	0	0	0	0	0	0	0	0	0	0	0,166	0,024	0	0	0,101	0,056	0	0	0	0	0	0	0	0	0	0
Arginine 2-monooxygenase inhibitor	0,382	0,083	0	0	0,219	0,214	0,248	0,178	0,449	0,061	0,470	0,055	0	0	0	0	0	0	0	0	0	0	0	0	0,298	0,131	0	0	0,238	0,189	0	0	0	0	0	0	0	0	0	0
N-acetylneuraminate 7-O(or 9-O)-acetyltransferase inhibitor	0,379	0,064	0	0	0,225	0,211	0,242	0,181	0,488	0,034	0,421	0,049	0,263	0,152	0,245	0,177	0	0	0	0	0	0	0	0	0,325	0,093	0	0	0,273	0,139	0	0	0	0	0	0	0	0	0	0
Apoptosis agonist	0,375	0,085	0	0	0,210	0,205	0	0	0	0	0,227	0,186	0	0	0	0	0,308	0,122	0,241	0,172	0	0	0,221	0,194	0,355	0,095	0,231	0,182	0,270	0,146	0	0	0	0	0,522	0,037	0,450	0,052	0,315	0,119
Alkenylglycerophosphoethanolamine hydrolase inhibitor	0,374	0,066	0	0	0	0	0,228	0,143	0,322	0,086	0,480	0,037	0	0	0	0	0	0	0	0	0	0	0	0	0,277	0,108	0	0	0,223	0,147	0	0	0	0	0	0	0	0	0	0
Neurotransmitter uptake inhibitor	0,373	0,134	0,440	0,089	0,519	0,054	0,314	0,193	0	0	0,263	0,263	0	0	0	0	0	0	0	0	0	0	0	0	0,373	0,134	0	0	0	0	0	0	0,266	0,259	0	0	0,304	0,204	0	0
Aspergillus nuclease S1 inhibitor	0,368	0,046	0,217	0,111	0,266	0,084	0,212	0,114	0,204	0,120	0,356	0,050	0	0	0	0	0	0	0	0	0	0	0	0	0,198	0,124	0	0	0	0	0	0	0	0	0	0	0	0	0	0
Fumarate reductase (NADH) inhibitor	0,364	0,016	0,160	0,143	0,206	0,084	0,202	0,088	0,361	0,017	0,516	0,004	0,207	0,083	0,157	0,148	0	0	0,167	0,130	0	0	0	0	0,402	0,011	0,177	0,116	0,276	0,040	0,163	0,137	0	0	0	0	0	0	0	0
Nitrite reductase (NO-forming) inhibitor	0,358	0,052	0,198	0,159	0,226	0,129	0,209	0,146	0,402	0,039	0,560	0,013	0,191	0,169	0	0	0	0	0	0	0	0	0	0	0,313	0,070	0	0	0,258	0,102	0	0	0	0	0	0	0	0	0	0
5 Hydroxytryptamine release stimulant	0,351	0,089	0	0	0	0	0	0	0,302	0,111	0	0	0	0	0	0	0	0	0	0	0	0	0	0	0,376	0,080	0	0	0,264	0,133	0	0	0	0	0	0	0	0	0	0
Bilirubin oxidase inhibitor	0,345	0,074	0	0	0,249	0,145	0	0	0,239	0,155	0,352	0,071	0	0	0	0	0	0	0	0	0	0	0,204	0,200	0,286	0,112	0	0	0	0	0	0	0	0	0	0	0	0	0	0
3-Demethylubiquinone-9 3-O-methyltransferase inhibitor	0,339	0,025	0,137	0,116	0,180	0,080	0,211	0,063	0	0	0,229	0,055	0	0	0	0	0	0	0	0	0	0	0	0	0,313	0,030	0,133	0,121	0,250	0,047	0	0	0	0	0	0	0	0	0	0
Cyclohexanone monooxygenase inhibitor	0,332	0,086	0	0	0	0	0,247	0,178	0,224	0,220	0,358	0,070	0	0	0	0	0	0	0	0	0	0	0	0	0,385	0,058	0,224	0,221	0,341	0,080	0	0	0	0	0	0	0	0	0	0
Lysostaphin inhibitor	0,328	0,065	0	0	0	0	0,181	0,155	0,451	0,037	0,486	0,032	0	0	0	0	0	0	0	0	0	0	0	0	0,227	0,114	0	0	0,195	0,141	0	0	0	0	0	0	0	0	0	0
Cl--transporting ATPase inhibitor	0,323	0,107	0	0	0	0	0,224	0,216	0,346	0,092	0,538	0,033	0	0	0	0	0	0	0	0	0	0	0	0	0,267	0,157	0	0	0,263	0,162	0	0	0	0	0	0	0	0	0	0
Glutaminase inhibitor	0,322	0,030	0,151	0,145	0,160	0,134	0,247	0,062	0,378	0,018	0,516	0,005	0	0	0	0	0	0	0	0	0	0	0	0	0,233	0,070	0	0	0,171	0,122	0	0	0	0	0	0	0	0	0	0
All-trans-retinyl-palmitate hydrolase inhibitor	0,315	0,082	0	0	0,194	0,185	0,191	0,189	0,435	0,042	0,294	0,094	0	0	0	0	0	0	0	0	0	0	0	0	0,315	0,082	0	0	0,249	0,125	0	0	0	0	0	0	0	0	0	0
Beta-adrenergic receptor kinase inhibitor	0,315	0,115	0	0	0	0	0	0	0,299	0,130	0,362	0,087	0	0	0	0	0	0	0,475	0,053	0	0	0	0	0,256	0,186	0	0	0,247	0,202	0	0	0	0	0	0	0	0	0	0
Simian immunodeficiency virus proteinase inhibitor	0,309	0,113	0	0	0	0	0,249	0,186	0,270	0,157	0,356	0,076	0	0	0	0	0	0	0	0	0	0	0	0	0,289	0,134	0	0	0,268	0,160	0	0	0	0	0	0	0	0	0	0
3-Cyanoalanine hydratase inhibitor	0,301	0,082	0	0	0	0	0	0	0,302	0,081	0,447	0,018	0	0	0	0	0	0	0	0	0	0	0	0	0,288	0,093	0	0	0,246	0,142	0	0	0	0	0	0	0	0	0	0
Aldehyde dehydrogenase inhibitor	0,297	0,018	0	0	0	0	0,124	0,099	0,456	0,006	0,392	0,010	0,140	0,082	0	0	0	0	0	0	0	0	0	0	0,173	0,057	0	0	0	0	0	0	0	0	0	0	0	0	0	0
Alcohol dehydrogenase (NADP+) inhibitor	0,267	0,024	0	0	0	0	0,134	0,087	0,205	0,038	0,423	0,013	0	0	0	0	0	0	0	0	0	0	0	0	0,134	0,088	0	0	0	0	0	0	0	0	0	0	0	0	0	0
Cholesterol antagonist	0,247	0,156	0	0	0	0	0,256	0,146	0,499	0,038	0,337	0,086	0	0	0	0	0	0	0	0	0	0	0	0	0,223	0,186	0	0	0	0	0	0	0	0	0	0	0	0	0	0
Maillard reaction inhibitor	0,231	0,122	0	0	0,251	0,096	0	0	0	0	0,197	0,181	0,581	0,004	0	0	0	0	0,306	0,047	0	0	0,212	0,153	0	0	0,342	0,029	0	0	0,216	0,146	0,212	0,153	0,302	0,049	0,223	0,134	0,254	0,092
HMGCS2 expression enhancer	0,230	0,217	0,235	0,207	0	0	0,433	0,043	0	0	0	0	0,230	0,219	0,250	0,178	0,228	0,223	0,712	0,009	0,305	0,108	0,347	0,077	0	0	0,480	0,033	0,260	0,163	0,261	0,161	0,334	0,086	0,340	0,081	0,308	0,105	0,243	0,191
Arachidonic acid antagonist	0,217	0,035	0,150	0,126	0,155	0,119	0,183	0,079	0,234	0,020	0,236	0,018	0	0	0	0	0	0	0	0	0	0	0	0	0,202	0,054	0	0	0,177	0,087	0	0	0	0	0	0	0	0	0	0
Azobenzene reductase inhibitor	0,212	0,013	0,133	0,046	0,146	0,036	0,521	0,002	0,134	0,045	0,151	0,033	0,104	0,086	0,116	0,065	0,131	0,048	0,113	0,070	0,102	0,090	0,102	0,090	0,136	0,043	0,104	0,086	0,303	0,006	0,104	0,087	0	0	0,183	0,019	0	0	0	0
ATPase stimulant	0,191	0,181	0	0	0	0	0	0	0,219	0,108	0	0	0,270	0,043	0	0	0	0	0,432	0,004	0,261	0,050	0,254	0,058	0,205	0,140	0,225	0,096	0,214	0,120	0,268	0,044	0,269	0,044	0,323	0,017	0,253	0,058	0,295	0,027
Benzoylformate decarboxylase inhibitor	0,188	0,051	0	0	0	0	0,135	0,108	0,171	0,064	0,442	0,007	0	0	0	0	0	0	0	0	0	0	0	0	0,151	0,084	0	0	0,128	0,123	0	0	0	0	0	0	0	0	0	0
Plasmanylethanolamine desaturase inhibitor	0,155	0,077	0	0	0	0	0	0	0	0	0,124	0,101	0	0	0	0	0	0	0	0	0	0	0	0	0	0	0	0	0	0	0	0	0	0	0	0	0	0	0	0
Lipoprotein disorders treatment	0,140	0,083	0	0	0	0	0	0	0,410	0,009	0,464	0,007	0	0	0	0	0	0	0	0	0	0	0	0	0,144	0,081	0	0	0	0	0	0	0	0	0	0	0	0	0	0
ErbB-1 antagonist	0	0	0	0	0	0	0	0	0	0	0	0	0	0	0	0	0	0	0	0	0	0	0	0	0	0	0	0	0	0	0	0	0	0	0	0	0,516	0,005	0	0
PfA-M1 aminopeptidase inhibitor	0	0	0	0	0	0	0,259	0,066	0	0	0	0	0,386	0,026	0	0	0	0	0,639	0,004	0,411	0,021	0	0	0	0	0	0	0	0	0,340	0,037	0	0	0,204	0,098	0	0	0	0
Others
Cardiotonic	0,391	0,040	0,276	0,093	0,374	0,046	0	0	0,443	0,027	0,373	0,046	0,410	0,034	0,276	0,093	0,331	0,061	0,285	0,087	0,358	0,050	0,193	0,179	0,472	0,022	0,205	0,164	0,343	0,056	0,463	0,024	0,313	0,070	0	0	0,314	0,070	0	0
Cardiovascular analeptic	0,502	0,024	0,776	0,005	0,255	0,072	0,213	0,098	0,174	0,137	0,172	0,138	0	0	0	0	0	0	0	0	0	0	0	0	0,319	0,050	0	0	0,227	0,088	0	0	0	0	0	0	0	0	0	0
Carminative	0,443	0,023	0	0	0,155	0,121	0,205	0,082	0,181	0,098	0,186	0,095	0	0	0	0	0	0	0	0	0	0	0	0	0,676	0,008	0,195	0,089	0,477	0,020	0	0	0	0	0	0	0	0	0	0
Caspase 3 stimulant	0,367	0,065	0	0	0,287	0,153	0,265	0,201	0,288	0,151	0,302	0,127	0	0	0	0	0	0	0,355	0,072	0	0	0	0	0,459	0,034	0,275	0,179	0,342	0,082	0,251	0,239	0	0	0,360	0,069	0,272	0,184	0	0
Caspase 8 stimulant	0,390	0,058	0	0	0,285	0,165	0,278	0,175	0,315	0,123	0,378	0,066	0	0	0	0	0	0	0	0	0	0	0	0	0,442	0,033	0,291	0,156	0,387	0,060	0	0	0	0	0	0	0	0	0	0
Celiac disease treatment	0	0	0	0	0	0	0	0	0	0	0	0	0,464	0,003	0	0	0	0	0	0	0	0	0	0	0	0	0	0	0	0	0	0	0	0	0	0	0	0	0	0
Chemopreventive	0,421	0,020	0,178	0,075	0,195	0,068	0,221	0,058	0,296	0,037	0,313	0,035	0	0	0	0	0	0	0	0	0	0	0	0	0,382	0,024	0	0	0,235	0,054	0	0	0	0	0	0	0	0	0	0
Chloride channel blocker	0,297	0,067	0	0	0	0	0,206	0,141	0,222	0,123	0,435	0,022	0	0	0	0	0	0	0	0	0	0	0	0	0	0	0	0	0	0	0	0	0	0	0	0	0	0	0	0
Choleretic	0,491	0,009	0,335	0,026	0,299	0,034	0,200	0,078	0,419	0,016	0,471	0,011	0,155	0,121	0	0	0	0	0	0	0	0	0	0	0,451	0,012	0,171	0,103	0,292	0,036	0,144	0,136	0	0	0,213	0,070	0	0	0	0
Fibrinolytic	0,613	0,066	0	0	0,317	0,192	0	0	0,583	0,082	0,569	0,090	0	0	0	0	0	0	0	0	0	0	0	0	0,561	0,094	0,247	0,247	0,492	0,124	0	0	0	0	0	0	0	0	0	0
Cognition disorders treatment	0	0	0,245	0,106	0,201	0,146	0	0	0	0	0	0	0	0	0	0	0	0	0	0	0	0	0,190	0,159	0,228	0,121	0,353	0,049	0,560	0,011	0,413	0,031	0,434	0,027	0,380	0,040	0,314	0,065	0,276	0,084
Free radical scavenger	0,485	0,011	0,197	0,078	0,260	0,042	0,217	0,063	0,413	0,016	0,374	0,020	0,162	0,114	0,161	0,115	0	0	0,259	0,042	0	0	0	0	0,413	0,016	0,196	0,079	0,230	0,055	0,154	0,123	0	0	0,163	0,113	0	0	0	0
Mucomembranous protector	0,871	0,006	0,403	0,172	0,785	0,022	0,634	0,086	0,838	0,010	0,931	0,004	0,459	0,148	0,305	0,236	0	0	0,330	0,215	0	0	0	0	0,802	0,018	0,333	0,213	0,679	0,066	0	0	0	0	0	0	0	0	0	0
Myc inhibitor	0,424	0,031	0,384	0,045	0,324	0,076	0,362	0,054	0,353	0,059	0,392	0,042	0,273	0,122	0,270	0,125	0,268	0,128	0,244	0,164	0,331	0,072	0,340	0,066	0,410	0,035	0,251	0,153	0,316	0,082	0,265	0,132	0	0	0,222	0,205	0	0	0	0
Hepatic disorders treatment	0,294	0,051	0	0	0,243	0,076	0,187	0,139	0,228	0,089	0,263	0,064	0	0	0,350	0,033	0,189	0,136	0	0	0	0	0	0	0,238	0,080	0	0	0	0	0	0	0	0	0	0	0	0	0	0
Potassium channel blocker	0,277	0,024	0,180	0,053	0,305	0,021	0	0	0,172	0,058	0,154	0,070	0	0	0	0	0	0	0,121	0,104	0,118	0,109	0,163	0,063	0,469	0,009	0,268	0,026	0,482	0,008	0,355	0,016	0,301	0,021	0,171	0,059	0,182	0,053	0	0
Preneoplastic conditions treatment	0,461	0,069	0	0	0	0	0,350	0,130	0,266	0,204	0,335	0,141	0	0	0	0	0	0	0	0	0	0	0	0	0,426	0,085	0,425	0,085	0,426	0,085	0	0	0	0	0	0	0	0	0	0
Prostate cancer treatment	0,205	0,072	0,174	0,092	0	0	0	0	0	0	0	0	0	0	0	0	0	0	0	0	0	0	0	0	0,221	0,066	0	0	0	0	0	0	0	0	0	0	0	0	0	0
Prostate disorders treatment	0,394	0,040	0,256	0,105	0,318	0,065	0	0	0,255	0,106	0,283	0,085	0	0	0	0	0	0	0	0	0	0	0	0	0,384	0,043	0	0	0	0	0	0	0	0	0	0	0	0	0	0
Respiratory analeptic	0,441	0,053	0,603	0,022	0,288	0,115	0	0	0,372	0,079	0,234	0,144	0,348	0,088	0	0	0	0	0	0	0	0	0	0	0,330	0,096	0	0	0	0	0	0	0	0	0	0	0	0	0	0
Nootropic	0,418	0,197	0	0	0,343	0,280	0	0	0,440	0,179	0	0	0,505	0,128	0	0	0	0	0,344	0,278	0	0	0	0	0,450	0,173	0	0	0	0	0	0	0	0	0	0	0	0	0	0
Hypolipemic	0,376	0,064	0,193	0,181	0,214	0,159	0,237	0,140	0,562	0,028	0,574	0,027	0,334	0,079	0	0	0	0	0,195	0,179	0	0	0	0	0,341	0,077	0	0	0	0	0	0	0	0	0	0	0	0	0	0
Retinoprotector	0,275	0,053	0,326	0,018	0,317	0,021	0,238	0,131	0	0	0,222	0,190	0	0	0	0	0	0	0	0	0	0	0	0	0,220	0,198	0	0	0	0	0	0	0,249	0,100	0	0	0	0	0	0
Spasmolytic	0,242	0,116	0,230	0,125	0,235	0,121	0	0	0,413	0,047	0,227	0,128	0,189	0,152	0	0	0	0	0	0	0	0	0	0	0,225	0,129	0	0	0	0	0	0	0	0	0	0	0	0	0	0
Cytoprotectant	0,649	0,014	0,325	0,157	0,485	0,067	0,377	0,111	0,620	0,023	0,652	0,013	0,411	0,092	0,293	0,197	0,264	0,240	0,599	0,031	0,301	0,186	0,273	0,227	0,627	0,021	0,297	0,191	0,411	0,092	0,362	0,122	0,344	0,137	0,347	0,134	0,396	0,100	0	0
Vasodilator, coronary	0,271	0,151	0	0	0,252	0,175	0	0	0,465	0,032	0,305	0,116	0	0	0	0	0	0	0	0	0	0	0	0	0,314	0,108	0	0	0	0	0	0	0	0	0	0	0	0	0	0
Vasoprotector	0,515	0,036	0,309	0,147	0,346	0,112	0,311	0,145	0,366	0,097	0,438	0,060	0,306	0,150	0	0	0	0	0,272	0,201	0,253	0,238	0	0	0,458	0,053	0,280	0,187	0,384	0,086	0,313	0,143	0,278	0,190	0,320	0,135	0,273	0,200	0	0
Alopecia treatment	0,620	0,016	0,352	0,145	0,400	0,106	0,478	0,060	0,333	0,164	0,462	0,068	0	0	0	0	0	0	0	0	0	0	0	0	0,433	0,084	0	0	0,340	0,157	0	0	0	0	0	0	0	0	0	0
Alzheimer's disease treatment	0	0	0	0	0	0	0	0	0	0	0	0	0,260	0,088	0,207	0,142	0	0	0	0	0	0	0	0	0,191	0,165	0,208	0,141	0	0	0	0	0	0	0,314	0,059	0	0	0,268	0,082
Analeptic	0,395	0,060	0,449	0,041	0,231	0,148	0	0	0,344	0,086	0,241	0,142	0,323	0,096	0	0	0	0	0	0	0	0	0	0	0,287	0,116	0	0	0	0	0	0	0	0	0	0	0	0	0	0
Analgesic	0	0	0	0	0,263	0,157	0	0	0	0	0	0	0	0	0	0	0	0	0	0	0	0	0	0	0	0	0,482	0,043	0,467	0,047	0	0	0,560	0,026	0	0	0	0	0	0
Anaphylatoxin receptor antagonist	0,669	0,028	0,324	0,166	0,606	0,039	0,347	0,145	0,434	0,089	0,575	0,045	0,319	0,171	0,338	0,153	0,375	0,123	0,272	0,232	0	0	0,298	0,195	0,462	0,077	0	0	0,277	0,223	0	0	0	0	0	0	0	0	0	0
Antiallergic	0,493	0,029	0,293	0,097	0,433	0,043	0	0	0,507	0,027	0,509	0,026	0	0	0,481	0,032	0	0	0,201	0,189	0	0	0	0	0,580	0,017	0,438	0,042	0,484	0,031	0	0	0	0	0	0	0	0	0	0
Antiamyloidogenic	0,341	0,058	0,389	0,035	0,380	0,038	0	0	0	0	0,216	0,154	0	0	0	0	0	0	0	0	0	0	0	0	0,375	0,040	0	0	0,317	0,073	0	0	0	0	0	0	0	0	0	0
Antianginal	0	0	0	0	0	0	0	0	0	0	0	0	0	0	0	0	0	0	0	0	0	0	0	0	0	0	0	0	0	0	0	0	0	0	0	0	0,306	0,172	0	0
Antiarrhythmic	0,261	0,039	0,179	0,078	0,264	0,038	0	0	0,317	0,026	0,237	0,047	0,286	0,033	0	0	0	0	0,191	0,070	0,140	0,117	0	0	0,379	0,018	0	0	0,238	0,047	0,265	0,038	0	0	0	0	0	0	0	0
Antiasthmatic	0,316	0,080	0	0	0,284	0,098	0	0	0,313	0,081	0,344	0,067	0	0	0,223	0,148	0	0	0	0	0	0	0	0	0,418	0,043	0,277	0,103	0,326	0,075	0	0	0	0	0	0	0	0	0	0
Antidyskinetic	0,577	0,044	0,391	0,109	0,594	0,040	0,336	0,157	0	0	0,306	0,196	0	0	0	0	0	0	0	0	0	0	0	0	0,527	0,056	0,297	0,210	0,467	0,073	0	0	0	0	0	0	0	0	0	0
Antieczematic	0	0	0	0	0	0	0	0	0,624	0,076	0,410	0,192	0	0	0	0	0	0	0	0	0	0	0	0	0	0	0	0	0	0	0	0	0	0	0	0	0	0	0	0
Antifibrinolytic	0,250	0,046	0	0	0	0	0	0	0,228	0,072	0,248	0,047	0	0	0	0	0	0	0	0	0	0	0	0	0,237	0,060	0	0	0,229	0,070	0	0	0	0	0	0	0	0	0	0
Antiglaucomic	0,155	0,071	0,203	0,041	0,124	0,107	0	0	0,216	0,035	0,149	0,077	0,151	0,074	0	0	0	0	0	0	0	0	0	0	0,190	0,048	0	0	0	0	0	0	0	0	0	0	0	0	0	0
Antihelmintic (Nematodes)	0,368	0,057	0	0	0,249	0,163	0	0	0,303	0,105	0,287	0,122	0	0	0	0	0	0	0	0	0	0	0	0	0,277	0,132	0	0	0,216	0,196	0	0	0	0	0	0	0	0	0	0
Antihypercholesterolemic	0,327	0,050	0	0	0	0	0	0	0,459	0,027	0,469	0,026	0,320	0,052	0	0	0	0	0	0	0	0	0	0	0,268	0,069	0	0	0	0	0	0	0	0	0	0	0	0	0	0
Antihypertensive	0	0	0	0	0	0	0	0	0,252	0,106	0	0	0	0	0	0	0	0	0	0	0	0	0	0	0	0	0	0	0	0	0	0	0	0	0	0	0	0	0	0
Antihypoxic	0,324	0,135	0	0	0,247	0,209	0	0	0,372	0,097	0,363	0,103	0	0	0	0	0	0	0	0	0	0	0	0	0,250	0,205	0	0	0	0	0	0	0	0	0	0	0	0	0	0
Antimutagenic	0,668	0,007	0,272	0,050	0,334	0,034	0,210	0,073	0,248	0,059	0,419	0,021	0	0	0	0	0	0	0	0	0	0	0	0	0,449	0,018	0	0	0,242	0,060	0	0	0	0	0	0	0	0	0	0
Antimyopathies	0,332	0,105	0	0	0	0	0	0	0,271	0,181	0	0	0	0	0	0	0	0	0	0	0	0	0	0	0,326	0,112	0	0	0,284	0,162	0	0	0	0	0	0	0	0	0	0
Antinephritic	0,290	0,103	0	0	0	0	0	0	0,293	0,097	0,272	0,139	0	0	0	0	0	0	0	0	0	0	0	0	0,323	0,054	0,238	0,221	0,288	0,107	0	0	0	0	0	0	0,234	0,232	0	0
Antineurotic	0	0	0	0	0	0	0	0	0	0	0	0	0	0	0	0	0	0	0	0	0	0	0	0	0,378	0,178	0	0	0,376	0,179	0	0	0	0	0	0	0	0	0	0
Antinociceptive	0,381	0,124	0,307	0,177	0,257	0,218	0,241	0,232	0	0	0	0	0	0	0	0	0	0	0,344	0,150	0	0	0	0	0,392	0,115	0	0	0,343	0,151	0	0	0	0	0	0	0	0	0	0
Antioxidant	0,344	0,017	0,202	0,054	0,257	0,034	0,141	0,114	0,222	0,045	0,243	0,038	0,184	0,066	0,307	0,022	0,188	0,063	0,160	0,090	0	0	0	0	0,257	0,034	0,201	0,055	0,234	0,041	0,173	0,075	0	0	0,195	0,058	0,153	0,100	0	0
Antiperistaltic	0,309	0,031	0	0	0,169	0,147	0,203	0,106	0	0	0	0	0	0	0	0	0	0	0	0	0	0	0	0	0,209	0,100	0	0	0,191	0,120	0	0	0	0	0	0	0	0	0	0
Antipruritic	0,294	0,123	0,271	0,148	0,260	0,159	0,226	0,190	0,413	0,055	0,368	0,069	0	0	0	0	0	0	0	0	0	0	0	0	0,270	0,148	0	0	0	0	0	0	0	0	0	0	0	0	0	0
Antipruritic, allergic	0,452	0,060	0	0	0,372	0,094	0,333	0,116	0,553	0,022	0,529	0,029	0	0	0	0	0	0	0	0	0	0	0	0	0,414	0,075	0	0	0,257	0,195	0	0	0	0	0	0	0	0	0	0
Antipruritic, non-allergic	0,268	0,050	0	0	0,184	0,107	0,153	0,138	0,285	0,042	0,343	0,025	0	0	0	0	0	0	0	0	0	0	0	0	0,228	0,072	0	0	0	0	0	0	0	0	0	0	0	0	0	0
Antipyretic	0,183	0,132	0	0	0	0	0	0	0,276	0,055	0,265	0,061	0	0	0	0	0	0	0	0	0	0	0	0	0,165	0,156	0,220	0,096	0	0	0	0	0	0	0	0	0	0	0	0
Antiseborrheic	0,827	0,014	0	0	0,269	0,137	0,372	0,100	0,558	0,062	0,771	0,024	0	0	0	0	0	0	0	0	0	0	0	0	0,657	0,045	0	0	0,440	0,084	0	0	0	0	0	0	0	0	0	0
Antisecretoric	0,290	0,095	0,279	0,100	0,237	0,132	0	0	0,283	0,098	0,263	0,110	0,201	0,167	0	0	0	0	0	0	0	0	0	0	0,252	0,118	0	0	0	0	0	0	0	0	0	0	0	0	0	0
Antiseptic	0,249	0,051	0	0	0	0	0,248	0,052	0	0	0,161	0,089	0	0	0	0	0	0	0	0	0	0	0	0	0	0	0	0	0	0	0	0	0	0	0	0	0	0	0	0
Antithrombotic	0	0	0	0	0	0	0	0	0,343	0,078	0,324	0,087	0	0	0	0	0	0	0	0	0	0	0	0	0	0	0	0	0	0	0	0	0	0	0	0	0	0	0	0
Antituberculosic	0,335	0,055	0,235	0,127	0,339	0,053	0,347	0,050	0,302	0,069	0,248	0,112	0,479	0,015	0	0	0	0	0,560	0,008	0,432	0,023	0,448	0,020	0,285	0,079	0,287	0,078	0,319	0,062	0,262	0,098	0,416	0,027	0,469	0,016	0	0	0,348	0,050
Antitussive	0,291	0,041	0,219	0,073	0,209	0,081	0	0	0,362	0,024	0,232	0,066	0	0	0	0	0	0	0	0	0	0	0	0	0,288	0,043	0	0	0	0	0	0	0	0	0	0	0	0	0	0
Antiulcerative	0,376	0,055	0,340	0,072	0,473	0,028	0,284	0,113	0,537	0,017	0,504	0,023	0	0	0	0	0	0	0	0	0	0	0	0	0,366	0,060	0	0	0,249	0,146	0	0	0	0	0	0	0	0	0	0
Antiuremic	0,365	0,021	0	0	0,145	0,127	0,155	0,115	0,426	0,011	0,467	0,007	0	0	0	0	0	0	0	0	0	0	0	0	0,174	0,096	0	0	0	0	0	0	0	0	0	0	0	0	0	0
